# Supplementary material for: Asymmetric synthesis of a highly functionalized bicyclo[3.2.2]nonene derivative
Source: publisher site journal article supplement (doi:10.3762/bjoc.9.74), 2013-04-04

## **Supporting Information**

for

### **Asymmetric synthesis of a highly functionalized bicyclo[3.2.2]nonene derivative**

Toshiki Tabuchi, Daisuke Urabe and Masayuki Inoue\*

Address: Graduate School of Pharmaceutical Sciences, The University of Tokyo, Hongo,  
Bunkyo-ku, Tokyo 133-0033 Japan

Email: Masayuki Inoue - inoue@mol.f.u-tokyo.ac.jp

\* Corresponding author

### **Experimental procedures and NMR spectra of all newly synthesized compounds**

#### **Contents**

|                                                                                                                |    |
|----------------------------------------------------------------------------------------------------------------|----|
| Experimental procedure for syntheses of compound <b>9</b> , <b>10</b> , <b>12</b> , <b>16</b> , and <b>17a</b> | S2 |
| <sup>1</sup> H and <sup>13</sup> C NMR spectra of newly synthesized compounds                                  | S5 |

**Allyl alcohol 9:** Crotylchloride (10 mL, 0.10 mol) was added to a solution of acetylacetone (21 mL, 0.20 mol) and  $K_2CO_3$  (18 g, 0.13 mol) in EtOH (200 mL) at 70 °C. The resulting solution was stirred at 70 °C for 22 h, and cooled to room temperature.  $H_2O$  (100 mL) was added to the mixture. The resultant mixture was extracted with  $Et_2O$  (30 mL  $\times$  3), and the organic layers were washed with  $H_2O$  (200 mL). The aqueous layer was re-extracted with  $Et_2O$  (150 mL  $\times$  3) and pentane (150 mL  $\times$  3). The combined organic layers were washed with  $H_2O$  (100 mL  $\times$  3), dried over  $Na_2SO_4$ , filtered and concentrated to afford the crude 2-hepten-6-one. A solution of vinylmagnesium bromide (1.0 M THF solution, 111 mL, 111 mmol) was added to the solution of the above crude 2-hepten-6-one in  $CH_2Cl_2$  (180 mL) at 0 °C. The reaction mixture was stirred at 0 °C for 20 min, and then saturated aqueous  $NH_4Cl$  (40 mL) was added. The resultant solution was extracted with  $Et_2O$  (30 mL  $\times$  3). The combined organic layers were washed with brine (30 mL), dried over  $Na_2SO_4$ , filtered and concentrated. The residue was purified by flash column chromatography (silica gel 250 g, pentane/ $Et_2O$  20:1 to 1:1) to afford allyl alcohol **9** [11.7 g as a 1.8:1 mixture of **9** (65 mmol,  $E/Z$  = 4/1) and  $Et_2O$ ] in 65% calculated yield from  $^1H$  NMR over 2 steps: yellow oil. Characterization data were identical with those previously reported (Cane, D. E.; Thomas, P. J. *J. Am. Chem. Soc.* **1984**, *106*, 5295–5303).

**Bromide 10:** NBS (11.5 g, 64.5 mmol) was added to a solution of **9** [11.7 g as a 1.8:1 mixture of **9** (65 mmol,  $E/Z$  = 4/1) and  $Et_2O$ ] in  $CCl_4$  (110 mL) at 0 °C. The reaction mixture was stirred at room temperature for 23 h, and at 30 °C for 18 h. The mixture was directly subjected to a flash column chromatography (silica gel 400 g, pentane/ $Et_2O$  100:1 to 20:1) to give **10** [15.4 g as a 1.1:1 mixture of **10** (53.4 mmol) and  $Et_2O$ ] as a diastereomixture (13:4:3:1), which was used in the next reaction without further purification:  $^1H$  NMR of the major isomer of **10** (400 MHz,  $CDCl_3$ )  $\delta$  1.30 (3H, s,  $CH_3C$ ), 1.64–2.2 (4H, m,  $CCH_2CH_2$ ), 1.76 (3H, d,  $J$  = 6.8 Hz,  $CH_3CHBr$ ), 3.96–4.06 (2H, m,  $CHBr$ ,  $CHO$ ), 5.00 (1H, dd,  $J$  = 11.0, 1.4 Hz,  $CH_AH_B=CH$ ), 5.19 (1H, dd,  $J$  = 17.4, 1.4 Hz,  $CH_AH_B=CH$ ), 5.92 (1H, dd,  $J$  = 17.4, 11.0 Hz,  $CH_2=CH$ ).

**Cycloheptenone 12:** The mixture of the above diastereomixture of **10** [15.4 g as a 1.1:1 mixture of **10** (53.4 mmol) and Et<sub>2</sub>O] and DBU (16.0 mL, 107 mmol) in 2,4,6-collidine (90 mL) was stirred at 110 °C for 3.5 h, and 170 °C for 16 h. After being cooled to room temperature, the reaction mixture was poured into an ice-cold 10% aqueous HCl (100 mL). The resulting mixture was extracted with Et<sub>2</sub>O (100 mL × 3). The combined organic layers were washed with 10% aqueous HCl (100 mL × 2), saturated aqueous NaHCO<sub>3</sub> (100 mL) and brine (100 mL), dried over Na<sub>2</sub>SO<sub>4</sub>, filtered and concentrated. The residue was purified by flash column chromatography (silica gel 250 g, pentane/Et<sub>2</sub>O 20:1 to 1:1) to afford cycloheptenone **12** [10.6 g as a 0.63:1 mixture of **12** (41 mmol) and Et<sub>2</sub>O] in 63% calculated yield from <sup>1</sup>H NMR over 2 steps. For a characterization of **12**, Et<sub>2</sub>O was completely removed from the mixture: red oil; IR (neat)  $\nu_{\text{max}}$ : 2967, 2930, 1706, 1450 cm<sup>-1</sup>; <sup>1</sup>H NMR (400 MHz, CDCl<sub>3</sub>)  $\delta$  1.07 (3H, d,  $J$  = 6.8 Hz, H20), 1.73 (3H, s, H17), 2.08–2.17 (2H, m, H2a and 14a), 2.21–2.26 (1H, m, H14b), 2.40–2.49 (1H, m, H2b), 2.51 (1H, ddd,  $J$  = 14.2, 7.3, 3.6 Hz, H3a), 2.73 (1H, ddd,  $J$  = 14.2, 11.0, 4.1 Hz, H3b), 2.80 (1H, dqd,  $J$  = 11.0, 6.8, 4.1 Hz, H5), 5.51 (1H, m, H15); <sup>13</sup>C NMR (100 MHz, CDCl<sub>3</sub>)  $\delta$  16.3, 25.8, 29.5, 32.2, 40.8, 45.9, 122.7, 137.2, 214.9; HRMS–ESI ( $m/z$ ): [M + Na]<sup>+</sup> calcd for C<sub>9</sub>H<sub>14</sub>ONa, 161.0937; found, 161.0943.

**MTPA ester 16:** DMAP in CH<sub>2</sub>Cl<sub>2</sub> (82 mM, 20  $\mu$ L, 1.7  $\mu$ mol) was added to a solution of **15** (2.3 mg, 17  $\mu$ mol), Et<sub>3</sub>N (18  $\mu$ L, 0.13 mmol), and (*R*)-MTPACl (12  $\mu$ L, 64  $\mu$ mol) in CH<sub>2</sub>Cl<sub>2</sub> (0.83 mL). The reaction mixture was stirred for 15 h at room temperature, and Et<sub>3</sub>N (18  $\mu$ L, 0.13 mmol) and (*R*)-MTPACl (12  $\mu$ L, 64  $\mu$ mol) were added. After being stirred for 8 h, the reaction mixture was quenched with H<sub>2</sub>O (2 mL). The resultant solution was extracted with CH<sub>2</sub>Cl<sub>2</sub> (3 mL × 4). The combined organic layers were dried over Na<sub>2</sub>SO<sub>4</sub>, filtered and concentrated to afford MTPA ester **16a**. According to this procedure, MTPA ester **16b** was synthesized from **15** (2.8 mg, 20  $\mu$ mol) by using (*S*)-MTPACl (30  $\mu$ L, 160  $\mu$ mol), Et<sub>3</sub>N (44  $\mu$ L, 310  $\mu$ mol), DMAP (82 mM, 25  $\mu$ L, 2.1  $\mu$ mol) in CH<sub>2</sub>Cl<sub>2</sub> (1 mL). **16a**: <sup>1</sup>H NMR (400 MHz, acetone-*d*<sub>6</sub>)  $\delta$  1.77 (3H, s, H17), 1.83 (1H, dddd,  $J$  = 14.6, 11.4, 2.8, 2.3 Hz, H3a), 1.87 (3H, s, H20), 2.02–2.16 (3H, m, H2ab and 3a), 3.59 (3H, br s, OCH<sub>3</sub>), 5.54 (1H, d,  $J$  = 7.8 Hz, H15), 5.63 (1H, br d,  $J$  = 5.0 Hz, H4), 5.78 (1H, d,  $J$  = 7.8 Hz, H14), 7.46–7.57 (5H, m,

aromatic). **16b**:  $^1\text{H}$  NMR (400 MHz, acetone- $d_6$ )  $\delta$  1.66 (3H, s, H20), 1.83 (3H, s, H17), 1.89–1.97 (1H, m, H3a), 2.17 (2H, m, H2a and 3b), 2.32–2.38 (1H, m, H2b), 3.59 (3H, br s,  $\text{OCH}_3$ ), 5.54 (1H, d,  $J = 7.8$  Hz, H15), 5.66 (1H, br s, H4), 5.72 (1H, d,  $J = 7.8$  Hz, H14), 7.46–7.59 (5H, m, aromatic).

**Cyclopropane 17a**:  $\text{BF}_3 \cdot \text{OEt}_2$  (5.0  $\mu\text{L}$ , 40  $\mu\text{mol}$ ) was added to a solution of **7** (18 mg, 71  $\mu\text{mol}$ ) and acrolein (24  $\mu\text{L}$ , 0.36 mmol) in toluene (0.14 mL) at room temperature. The reaction mixture was stirred for 20 min, and then quenched with saturated aqueous  $\text{NaHCO}_3$  (1 mL). The resultant mixture was extracted with  $\text{CH}_2\text{Cl}_2$  (2 mL  $\times$  4). The combined organic layers were dried over  $\text{Na}_2\text{SO}_4$ , filtered and concentrated. The residue was purified by flash column chromatography (silica gel 0.7 g, pentane/ $\text{Et}_2\text{O}$  1:0 to 5:1) to afford impure cyclopropane **17ab**. The material was further purified by preparative-TLC (hexane/ $\text{CH}_2\text{Cl}_2$  6:1) to afford cyclopropane **17ab** as a 2.9:1 diastereomixture (2.4 mg, 14  $\mu\text{mol}$ ) in 20% combined yield. The diastereomixture was further purified by preparative-TLC (hexane/ $\text{CH}_2\text{Cl}_2$  6:1) to afford pure cyclopropane **17a** (1 mg) for the characterization: colorless oil;  $^1\text{H}$  NMR (400 MHz,  $\text{CDCl}_3$ )  $\delta$  0.05–0.08 (2H, m,  $\text{CHCH}_2\text{CH}$ ), 0.71–0.75 (2H, m,  $\text{CHCH}_2\text{CH}$ ), 1.28 (3H, s, H17 or 20), 1.32 (3H, s, H17 or 20), 1.41 (1H, dd,  $J = 12.8, 4.1$  Hz,  $\text{CCH}_\text{A}\text{H}_\text{B}\text{CHCHO}$ ), 1.71 (1H, dd,  $J = 12.8, 9.6$  Hz,  $\text{CCH}_\text{A}\text{H}_\text{B}\text{CHCHO}$ ), 2.42 (1H, ddd,  $J = 9.6, 4.6, 4.1$  Hz,  $\text{CHCHO}$ ), 5.43 (1H, d,  $J = 8.2$  Hz,  $\text{CH}=\text{CHCCHCHO}$ ), 5.61 (1H, d,  $J = 8.2$  Hz,  $\text{CH}=\text{CHCCHCHO}$ ), 9.29 (1H, d,  $J = 4.6$  Hz,  $\text{CHO}$ );  $^{13}\text{C}$  NMR (100 MHz,  $\text{CDCl}_3$ )  $\delta$  1.2, 17.1, 17.4, 22.6, 24.1, 35.6, 36.7, 38.5, 59.1, 130.2, 135.0, 205.5; HRMS–ESI ( $m/z$ ):  $[\text{M} + \text{Na}]^+$  calcd for  $\text{C}_{12}\text{H}_{16}\text{ONa}$ , 199.1093; found, 199.1092.

# Cycloheptenone 12

G:\PHannou inoue\Tabuchi Toshiki\ryanodine\DATA\chiral-intermediate\7memberedring\7membering without side chain(1-99).als

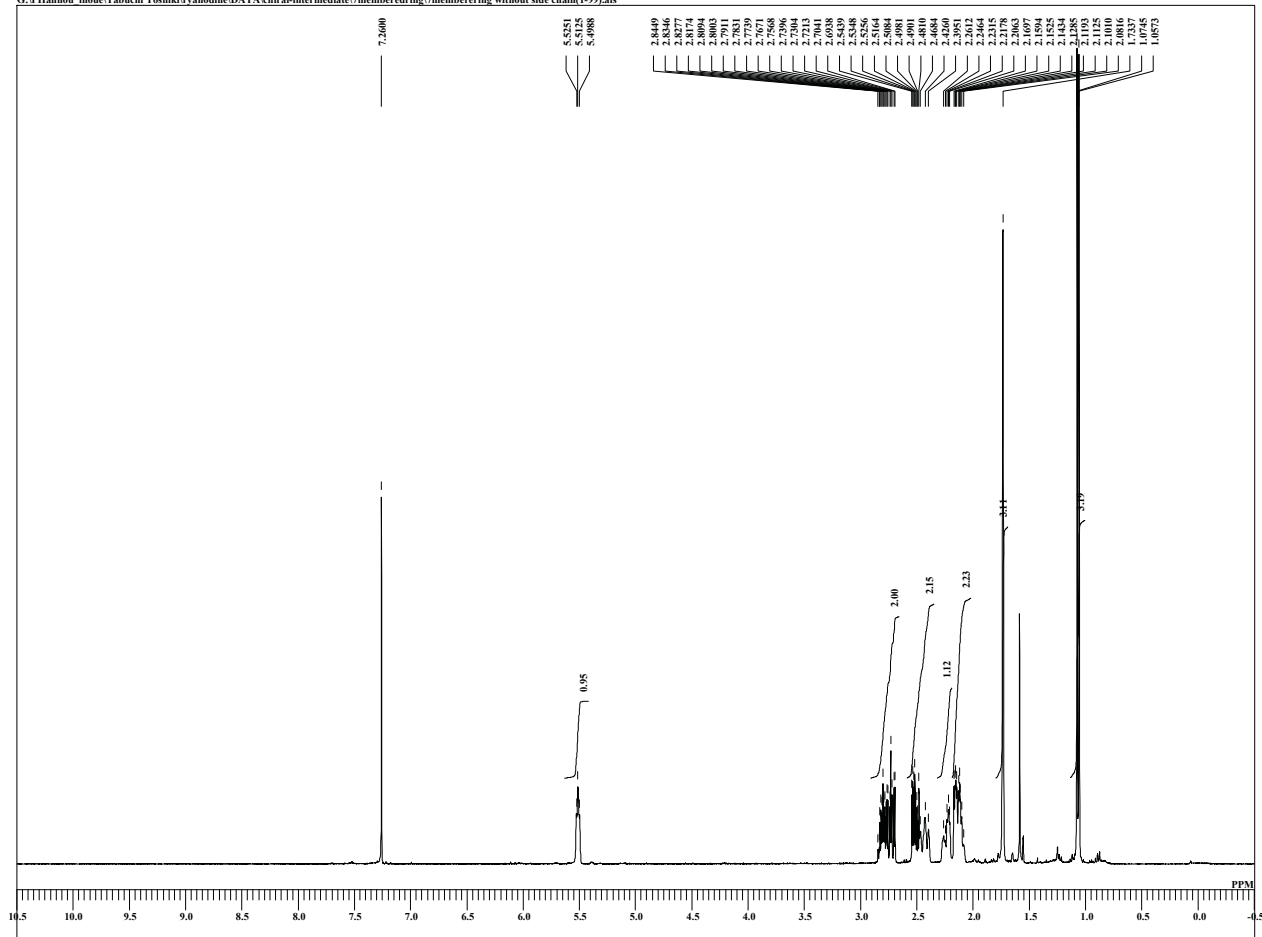

7membering without side chain  
 TT1-490609-1-99-f10-16  
 09-06-2009 12:23:38  
 1H  
 395.88 MHz  
 395.88 MHz  
 6.28 KHz  
 0.87 Hz  
 6.50 usec  
 0.00 usec  
 0.00000 msec  
 1.0000 sec  
 13107  
 13107  
 16  
 1  
 5938.15 Hz  
 30000 Hz  
 16.68 usec  
 2.2073 sec  
 2.0000 sec  
 16  
 16  
 44  
 0.01 Hz  
 0.00  
 90.00  
 100.00  
 single\_pulse.ex2  
 1H  
 395.88 MHz  
 6.28 KHz  
 0.87 Hz  
 115 usec  
 79  
 79  
 7membering without side chain  
 SF  
 13.20 KHz  
 75.7 Hz  
 0  
 0  
 0  
 0 Hz  
 19.2 c  
 CDCl3  
 7.26 ppm

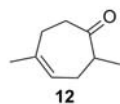

# Cycloheptenone 12

C:\Documents and Settings\PC-USER\My Documents\DATA\TTTTTTTTTTTTTTTTTabuchi toshiki\Master thesis\letter\7-memb\TT1-120921-7-memb-C-2.als

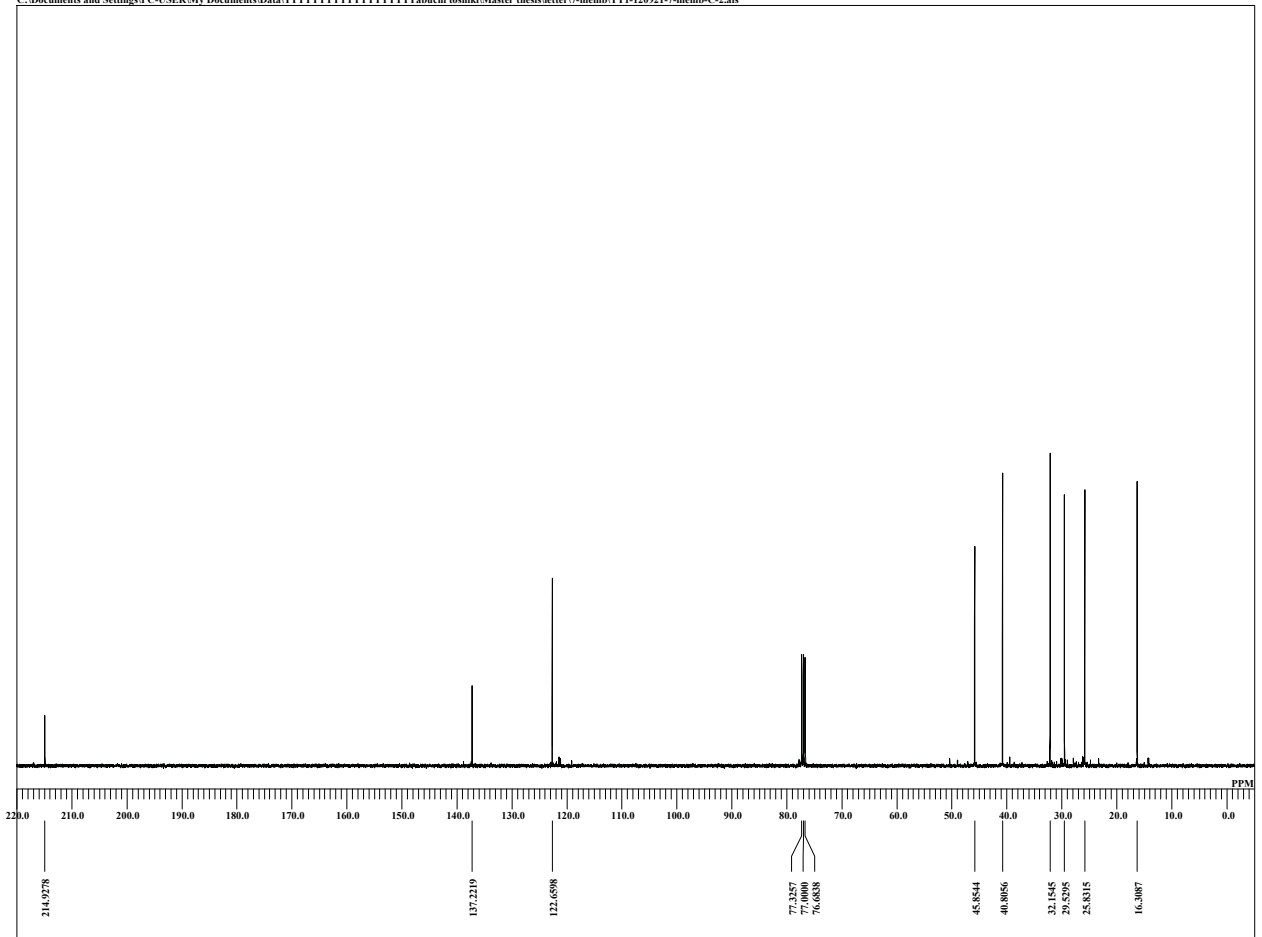

TT1-120921-7-memb-C-2.als  
 TT1-120921-7-memb-C  
 21-09-2012 12:44:33  
 13C  
 99.55 MHz  
 99.55 MHz  
 5.13 KHz  
 0.98 Hz  
 3.25 usec  
 0.00 usec  
 0.00000 msec  
 1.0000 sec  
 26214  
 26214  
 160  
 4  
 24999.62 Hz  
 125000 Hz  
 20.50 usec  
 1.0486 sec  
 2.0000 sec  
 160  
 16  
 60  
 1.00 Hz  
 0.00  
 0.00  
 100.00  
 100.00  
 single\_pulse\_dec  
 1H  
 395.88 MHz  
 6.28 KHz  
 0.87 Hz  
 115 usec  
 79  
 79  
 TT1-120921-7-memb-C-2.als  
 SF  
 13.20 KHz  
 75.7 Hz  
 0  
 0  
 0  
 0 Hz  
 24.6 c  
 CDCl3  
 77.00 ppm

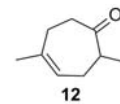

# TMS-enol ether 13

C:\Documents and Settings\PC-USER\My Documents\Data\TTTTTTTTTTTTTTTTTabuchi toshiki\Master thesis\TMS-enolether\TT1-090720-1-173-TMinPhILab

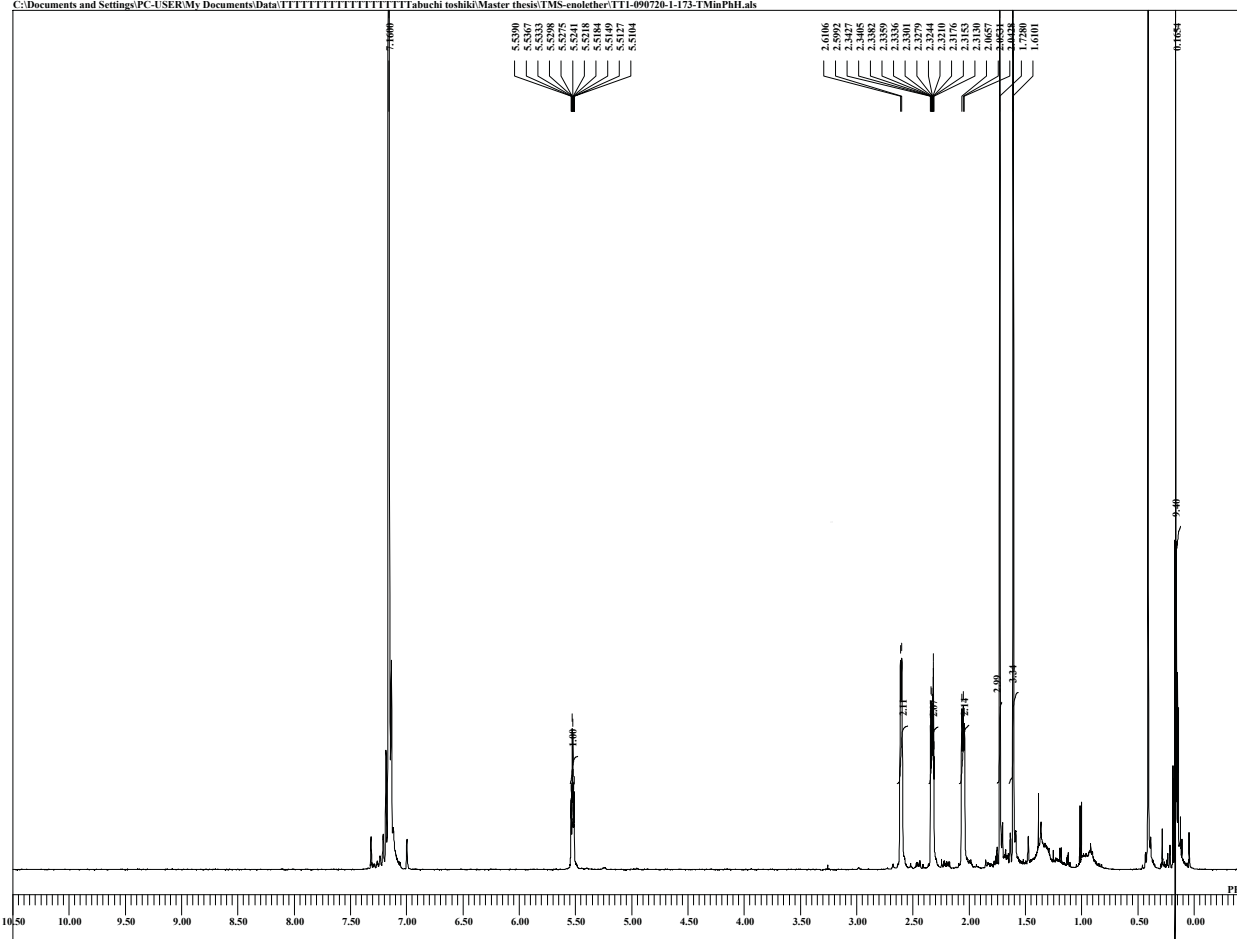

DFILE TT1-090720-1-173-TMinPhILab  
 COMNT TT1-090720-1-173-TMinPhILab  
 DATIM 20-07-2009 14:03:15  
 MENUF  
 OBNUC 1H  
 OFR 495.13 MHz  
 OFRQ 495.13 MHz  
 OBSET 4.38 KHz  
 OBFIN 9.64 Hz  
 PW1 6.20 usec  
 DEADT 0.00 usec  
 PREDL 0.00000 msec  
 IWT 1.0000 sec  
 POINT 13107  
 SPO 13107  
 TIMES 16  
 DUMMY 1  
 FREQU 7429.31 Hz  
 FLT 38000 Hz  
 DELAY 13.16 usec  
 ACQTM 1.7642 sec  
 PD 5.0000 sec  
 SCANS 16  
 ADBIT 16  
 RGAIN 56  
 BF 0.01 Hz  
 T1 0.00  
 T2 0.00  
 T3 90.00  
 T4 100.00  
 EXMOD single\_pulse.ex2  
 EXPCM  
 IRNUC 1H  
 IFR 495.13 MHz  
 IRSET 4.38 KHz  
 IRFIN 9.64 Hz  
 IRRPW 50 usec  
 IRATN 79  
 DFILE TT1-090720-1-173-TMinPhILab  
 SF  
 LKSET -601.50 KHz  
 LKFIN -9.4 Hz  
 LKLEV 0  
 LGAIN 0  
 LKPHS 0  
 LKSG 0  
 CSPED 0 Hz  
 FILDC  
 FILDF  
 CTMP 24.0 c  
 SLYNT C6D6  
 EXREF 7.16 ppm

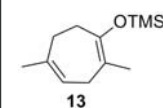

# TMS-enol ether 13

G:\Phannou inoue\Tabuchi Toshiki\ryanodine\DATA\chiral-intermediate\silvlenolether\desired\TT1-090720-1-173-TMinPhILab

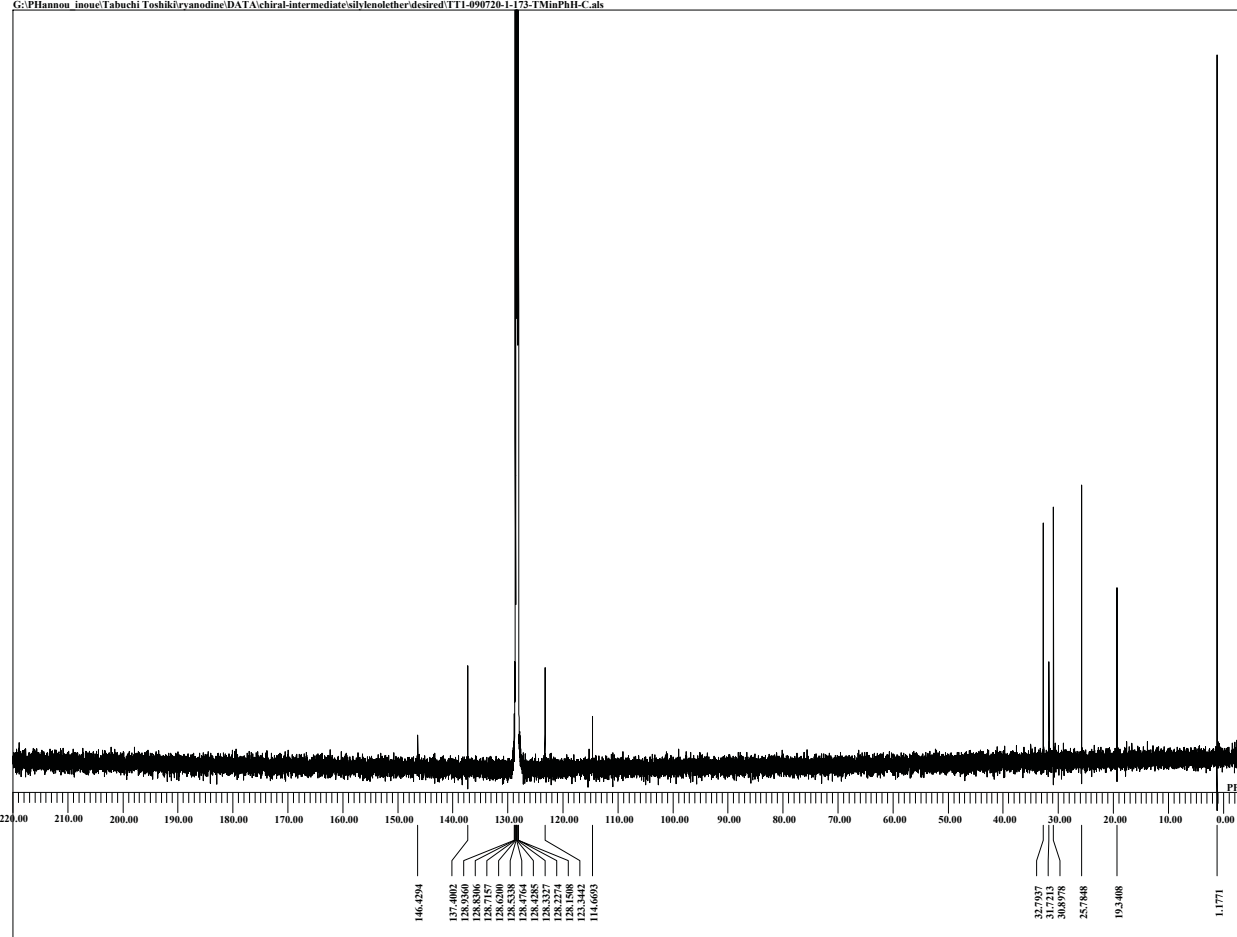

DFILE TT1-090720-1-173-TMinPhILab  
 COMNT 2-7  
 DATIM 20-07-2009 21:57:05  
 MENUF  
 OBNUC 13C  
 OFR 124.51 MHz  
 OFRQ 124.51 MHz  
 OBSET 3.45 KHz  
 OBFIN 6.00 Hz  
 PW1 3.57 usec  
 DEADT 0.00 usec  
 PREDL 0.00000 msec  
 IWT 1.0000 sec  
 POINT 26214  
 SPO 26214  
 TIMES 10000  
 DUMMY 4  
 FREQU 31249.52 Hz  
 FLT 157000 Hz  
 DELAY 20.80 usec  
 ACQTM 0.8389 sec  
 PD 2.0000 sec  
 SCANS 10000  
 ADBIT 16  
 RGAIN 56  
 BF 0.01 Hz  
 T1 0.00  
 T2 0.00  
 T3 90.00  
 T4 100.00  
 EXMOD single\_pulse\_dec  
 EXPCM  
 IRNUC 1H  
 IFR 495.13 MHz  
 IRSET 4.38 KHz  
 IRFIN 9.64 Hz  
 IRRPW 50 usec  
 IRATN 79  
 DFILE TT1-090720-1-173-TMinPhILab  
 SF  
 LKSET -601.50 KHz  
 LKFIN -9.4 Hz  
 LKLEV 0  
 LGAIN 0  
 LKPHS 0  
 LKSG 0  
 CSPED 0 Hz  
 FILDC  
 FILDF  
 CTMP 25.8 c  
 SLYNT C6D6  
 EXREF 128.62 ppm

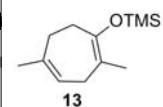

regioisomer of 13

G:\Phannou inoue\Tabuchi Toshiko\2d\TT1-090723-1-183-TM1-1.xls

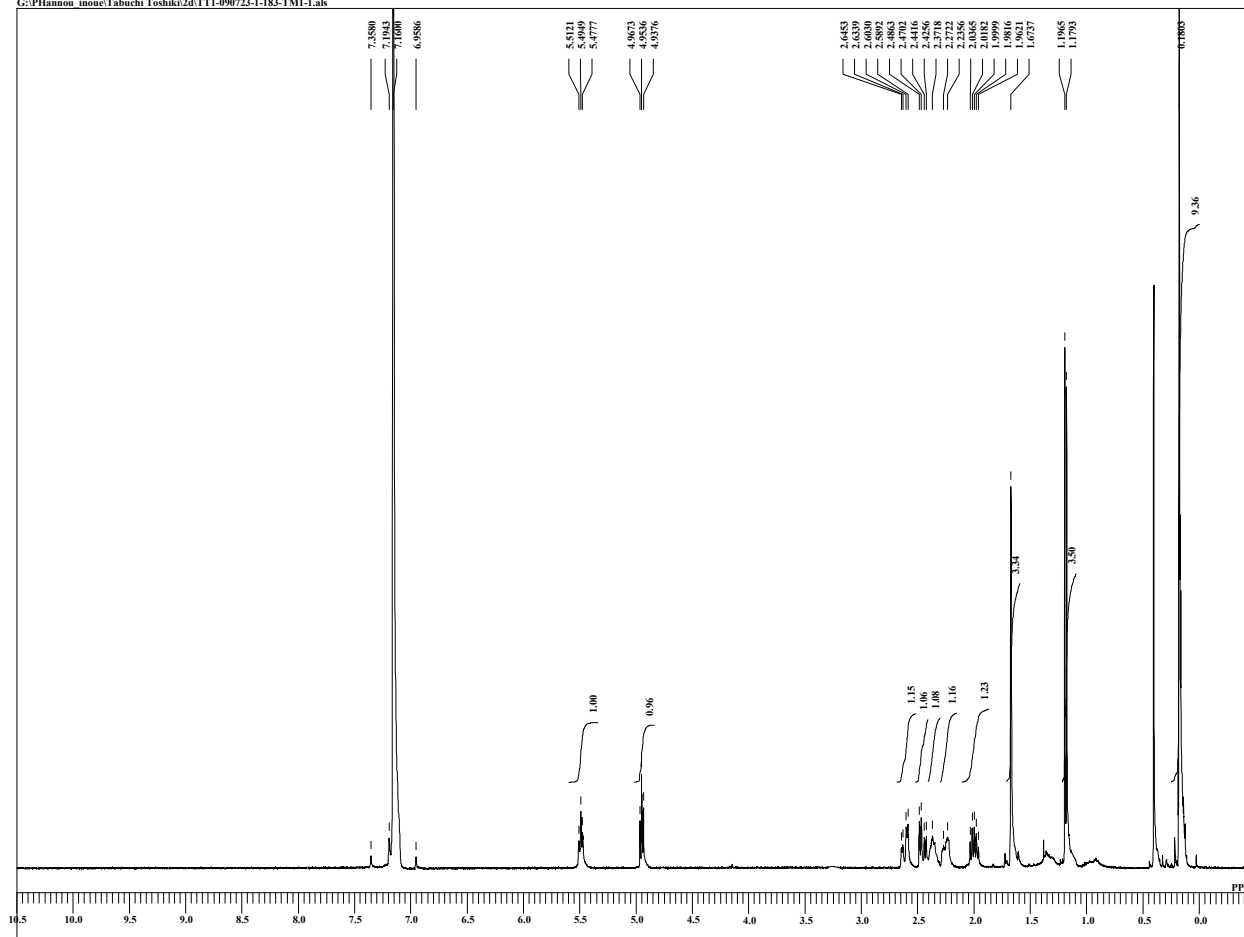

DFILE TT1-090723-1-183-TM1-1.xls  
 COMNT 2-8  
 DATIM 23-07-2009 12:32:42  
 MENIF  
 OBNUC 1H  
 OFR 395.88 MHz  
 OFRQ 395.88 MHz  
 OSSET 6.28 KHz  
 OBFIN 0.87 Hz  
 PW1 6.50 usec  
 DEADT 0.00 usec  
 PREDL 0.00000 msec  
 IWT 1.0000 sec  
 POINT 13107  
 SPO 13107  
 TIMES 16  
 DUMMV 1  
 FREQU 593.15 Hz  
 FLT 30000 Hz  
 DELAY 16.68 usec  
 ACQTM 2.2073 sec  
 PD 2.0000 sec  
 SCANS 16  
 ADBIT 16  
 RGAIN 46  
 BF 0.01 Hz  
 T1 0.00  
 T2 0.00  
 T3 90.00  
 T4 100.00  
 EXMOD single\_pulse.ex2  
 EXPCM  
 IRNUC 1H  
 IFR 395.88 MHz  
 IRSET 6.28 KHz  
 IRFIN 0.87 Hz  
 IRPW 147 usec  
 IRATN 79  
 DFILE TT1-090723-1-183-TM1-1.xls  
 SF  
 LKSET 13.20 KHz  
 LKFIN 69.6 Hz  
 LKLEV 0  
 LGAIN 0  
 LKPHS 0  
 LKSG 0 Hz  
 CSPED  
 FILDC  
 FILDF  
 CTEMP 24.1 c  
 SLVNT C6D6  
 EXREF 7.16 ppm

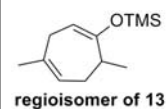

# Diene 14

G:\Phannou inoue\Tabuchi Toshiki\ryanodine\DATA\chiral-intermediate\dienone\dienone(1-195-TM).als

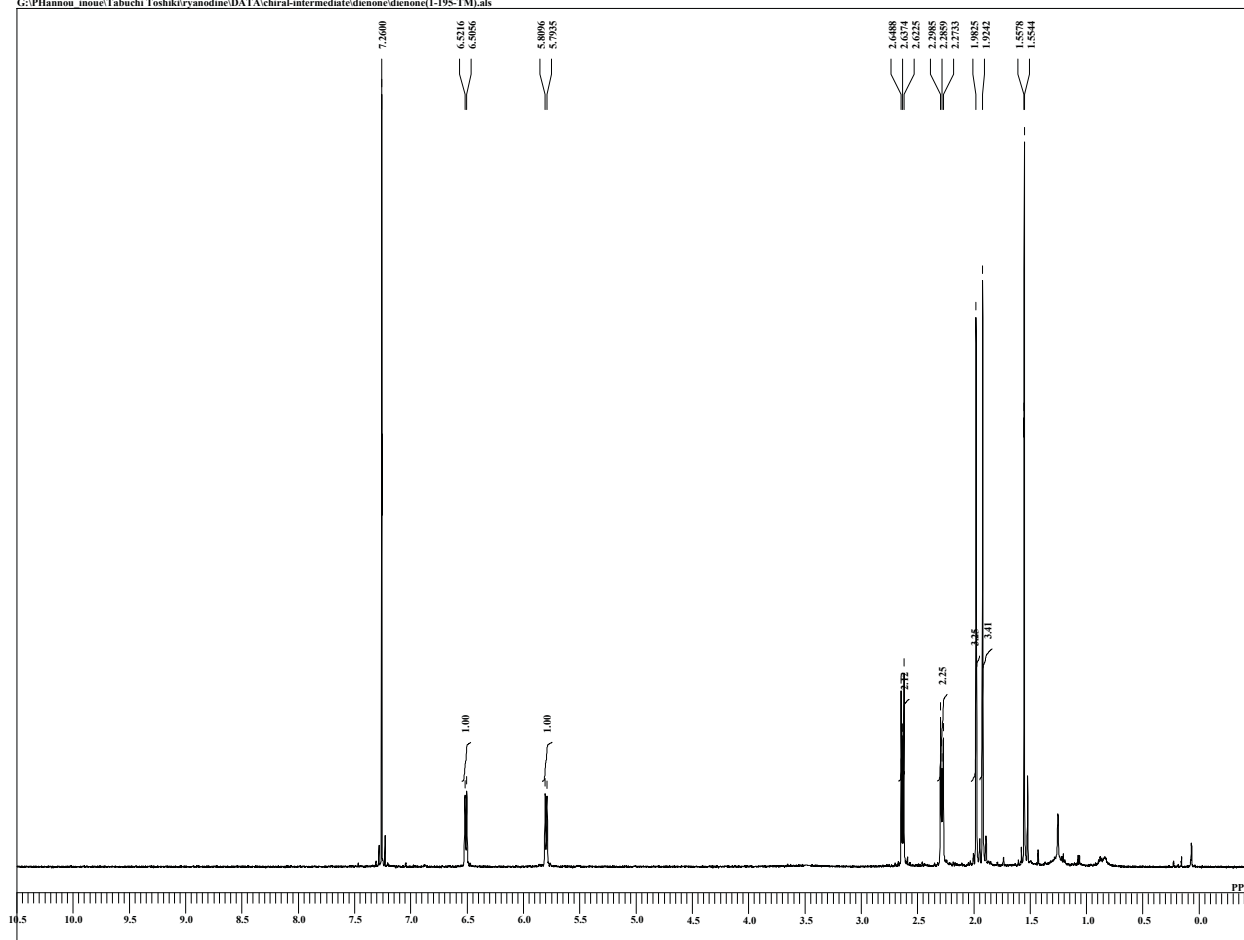

DFILE dienone(1-195-TM).als  
COMNT 1-38  
DATIM 27-07-2009 22:28:55  
MENUF  
OBNUC 1H  
OFR 495.13 MHz  
OBFREQ 495.13 MHz  
OBSET 4.38 KHz  
OBFIN 9.64 Hz  
PW1 6.20 usec  
DEADT 0.00 usec  
PREDL 0.00000 msec  
IWT 1.0000 sec  
POINT 13107  
SPO 13107  
TIMES 16  
DUMMY 1  
FREQU 7429.51 Hz  
FLT 38000 Hz  
DELAY 13.16 usec  
ACQTM 1.7642 sec  
PD 2.0000 sec  
SCANS 16  
ADBIT 16  
RGAIN 60  
BF 0.01 Hz  
T1 0.00  
T2 0.00  
T3 90.00  
T4 100.00  
EXMOD single\_pulse.v2  
EXPCM 1H  
IRNUC 495.13 MHz  
IFR 495.13 MHz  
IRSET 4.38 KHz  
IRFIN 9.64 Hz  
IRRPW 50 usec  
IRATN 79  
DFILE dienone(1-195-TM).als  
SF 4  
LKSET 748.40 KHz  
LKFIN 98.2 Hz  
LKLEV 0  
LGAIN 0  
LKPHS 0  
LKSG 0  
CSPED 0 Hz  
FILDC  
FILDF  
CTEMP 24.3 c  
SLVNT CDCl3  
XREF 7.26 ppm

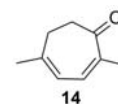

# Diene 14

G:\Phannou inoue\Tabuchi Toshiki\ryanodine\DATA\chiral-intermediate\dienone\dienone(2-1-TM-C)-1.als

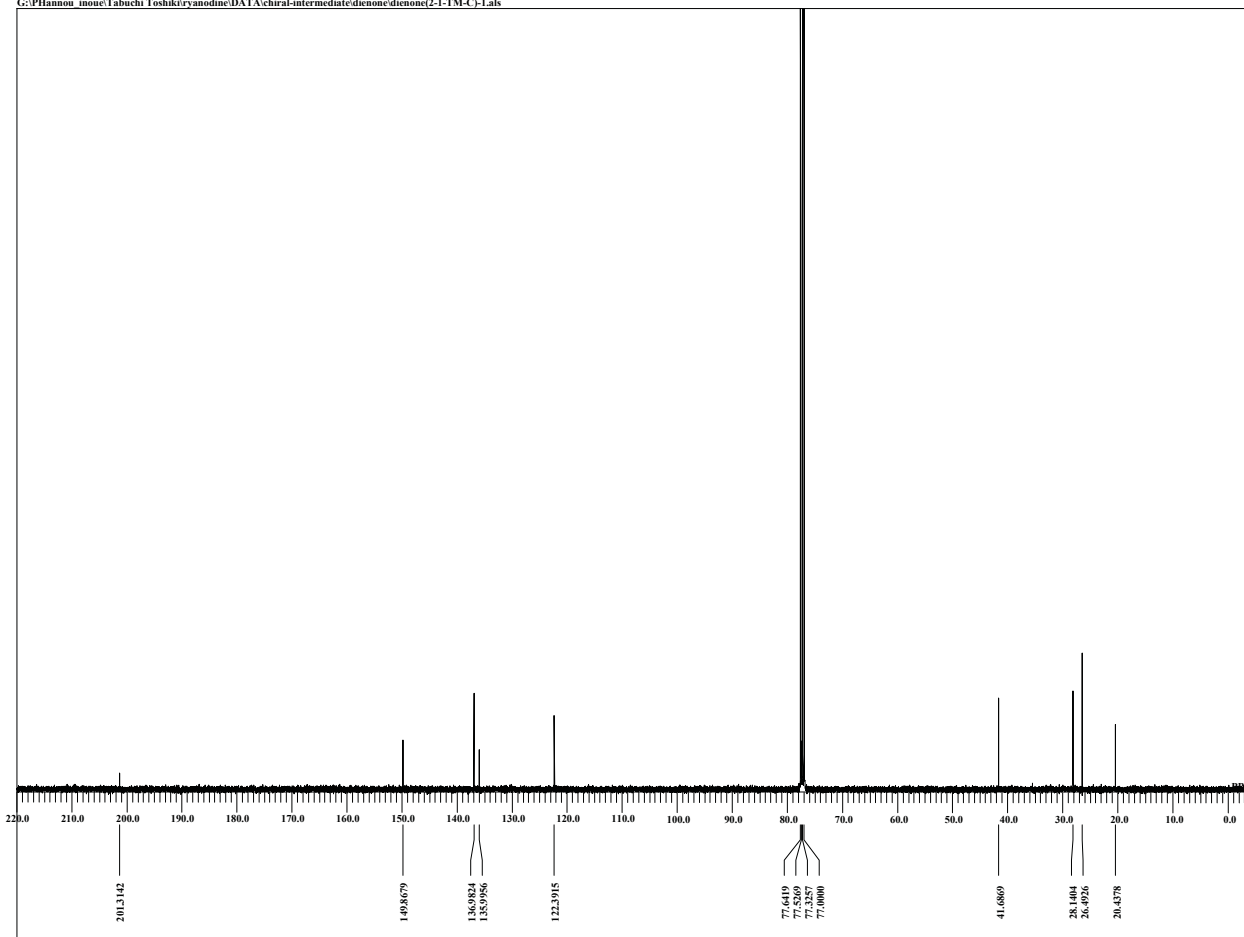

DFILE dienone(2-1-TM-C)-1.als  
COMNT 1-38  
DATIM 31-07-2009 06:29:11  
MENUF  
OBNUC 13C  
OFR 99.55 MHz  
OBFREQ 99.55 MHz  
OBSET 5.13 KHz  
OBFIN 0.98 Hz  
PW1 3.25 usec  
DEADT 0.00 usec  
PREDL 0.00000 msec  
IWT 1.0000 sec  
POINT 26214  
SPO 26214  
TIMES 7000  
DUMMY 4  
FREQU 24999.62 Hz  
FLT 125000 Hz  
DELAY 20.50 usec  
ACQTM 1.0486 sec  
PD 2.0000 sec  
SCANS 7000  
ADBIT 16  
RGAIN 60  
BF 0.01 Hz  
T1 0.00  
T2 0.00  
T3 60.00  
T4 100.00  
EXMOD single\_pulse\_dec  
EXPCM 1H  
IRNUC 395.88 MHz  
IFR 395.88 MHz  
IRSET 6.28 KHz  
IRFIN 0.97 Hz  
IRRPW 115 usec  
IRATN 79  
DFILE dienone(2-1-TM-C)-1.als  
SF 4  
LKSET 13.20 KHz  
LKFIN 75.7 Hz  
LKLEV 0  
LGAIN 0  
LKPHS 0  
LKSG 0  
CSPED 0 Hz  
FILDC  
FILDF  
CTEMP 24.6 c  
SLVNT CDCl3  
XREF 77.00 ppm

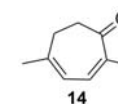



Diene 15

G:\PHannou inoue\Tabuchi Toshiki\ryanodine\DATA\chiral-intermediate\7-memb-alcohol\7member-alcohol-(3-79-TM).als

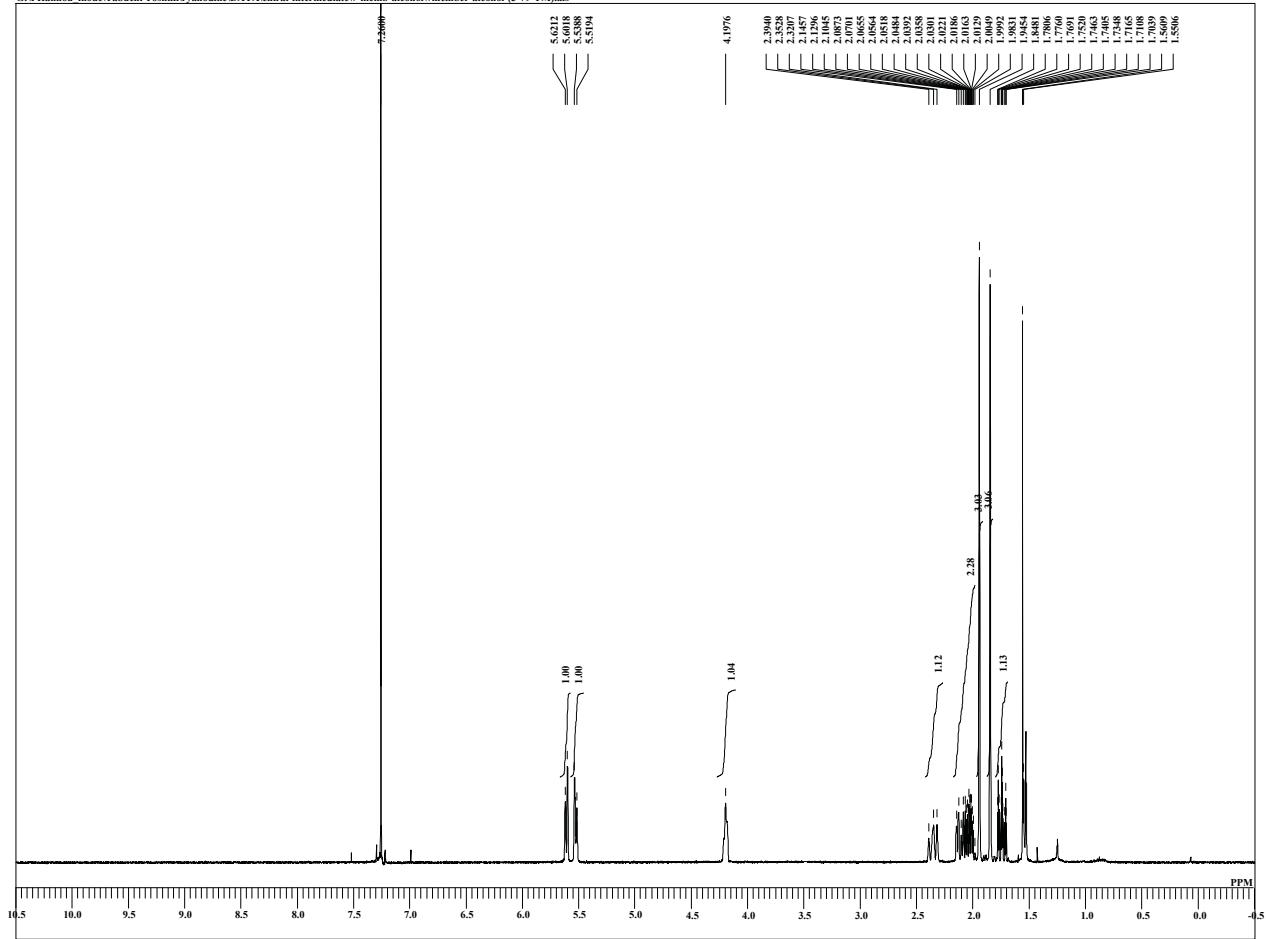

DFILE 7member-alcohol-(3-79-TM).als  
COMNT 2-19  
DATIM 08-01-2010 10:47:35  
MENUE  
OBNUC 1H  
OFR 395.88 MHz  
OBFREQ 395.88 MHz  
OBSET 6.28 KHz  
OBFIN 0.87 Hz  
PW1 6.50 usec  
DEADT 0.00 usec  
PREDL 0.00000 msec  
IWT 1.0000 sec  
POINT 13107  
SPO 13107  
TIMES 16  
DUMMY 1  
FREQU 5938.15 Hz  
FLT 30000 Hz  
DELAY 16.68 usec  
ACQTM 2.2073 sec  
PD 2.0000 sec  
SCANS 16  
ADBIT 16  
RGAIN 50  
BF 0.01 Hz  
T1 0.00  
T2 0.00  
T3 90.00  
T4 100.00  
EXMOD single\_pulse.ex2  
EXPCM 1H  
IRNUC  
IFR 395.88 MHz  
IRSET 6.28 KHz  
IRFIN 0.87 Hz  
IRRPW 115 usec  
IRATN 79  
DFILE 7member-alcohol-(3-79-TM).als  
SF  
LKSET 13.20 KHz  
LKFIN 75.7 Hz  
LKLEV 0  
LGAIN 0  
LKPHS 0  
LKSG 0 Hz  
CSPED  
FILDC  
FILDF  
CTEMP 18.4 c  
SLVNT CDCl3  
XREF 7.26 ppm

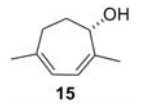

Diene 15

G:\PHannou inoue\Tabuchi Toshiki\ryanodine\DATA\chiral-intermediate\7-memb-alcohol\TT1-100330-diene-OH-C-als

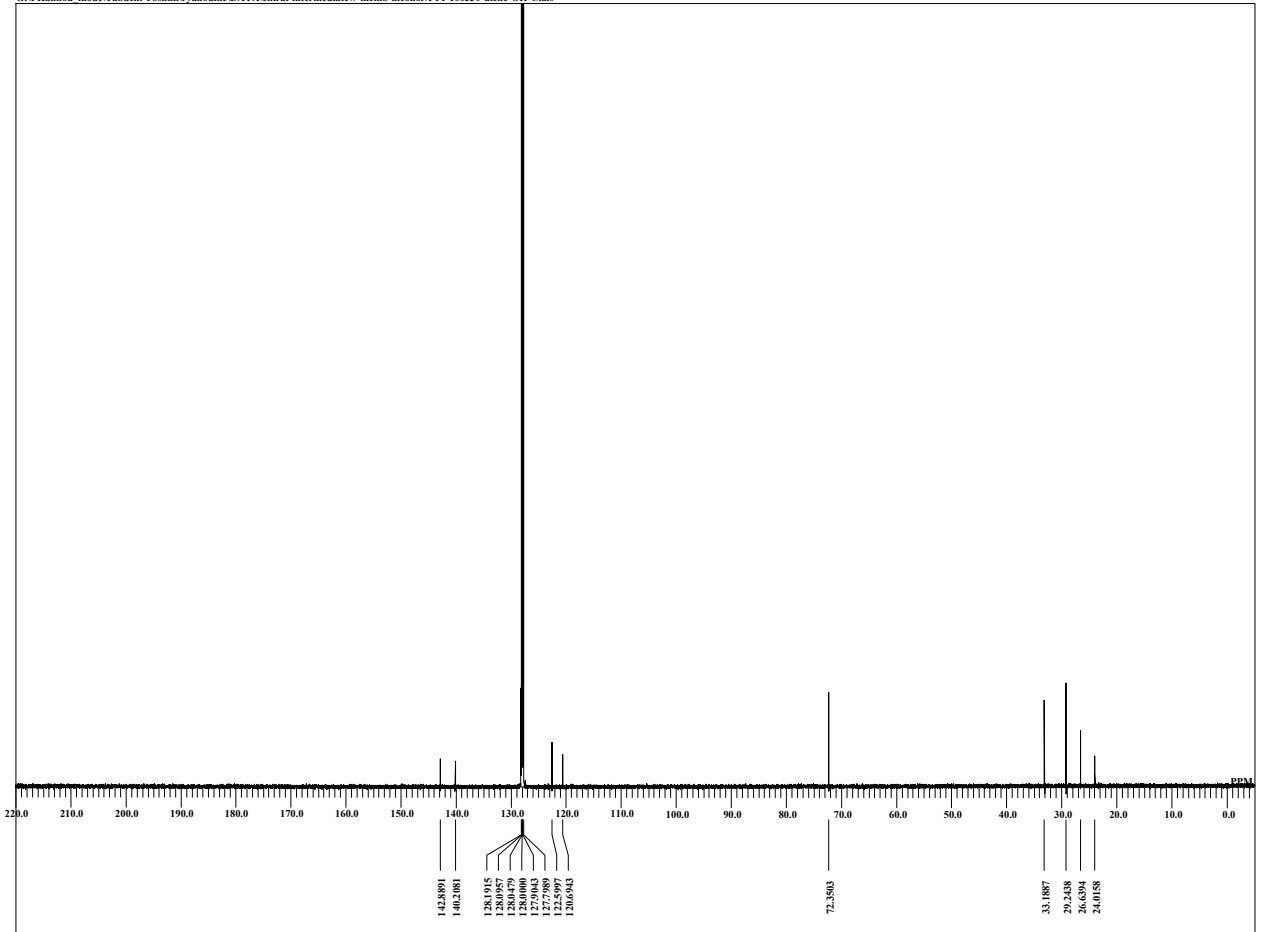

DFILE TT1-100330-diene-OH-C-als  
COMNT 2-19  
DATIM 30-03-2010 21:09:46  
MENUE  
OBNUC 13C  
OFR 124.51 MHz  
OBFREQ 124.51 MHz  
OBSET 3.45 KHz  
OBFIN 6.00 Hz  
PW1 3.25 usec  
DEADT 0.00 usec  
PREDL 0.00000 msec  
IWT 1.0000 sec  
POINT 32768  
SPO 32768  
TIMES 3516  
DUMMY 4  
FREQU 39062.50 Hz  
FLT 157000 Hz  
DELAY 20.80 usec  
ACQTM 0.6389 sec  
PD 2.0000 sec  
SCANS 3516  
ADBIT 16  
RGAIN 58  
BF 0.01 Hz  
T1 0.00  
T2 0.00  
T3 90.00  
T4 100.00  
EXMOD single\_pulse\_dec  
EXPCM 1H  
IRNUC  
IFR 495.13 MHz  
IRSET 4.38 KHz  
IRFIN 9.64 Hz  
IRRPW 92 usec  
IRATN 79  
DFILE TT1-100330-diene-OH-C-als  
SF  
LKSET 748.40 KHz  
LKFIN 90.6 Hz  
LKLEV 0  
LGAIN 0  
LKPHS 0  
LKSG 0 Hz  
CSPED  
FILDC  
FILDF  
CTEMP 19.6 c  
SLVNT C6D6  
XREF 128.00 ppm

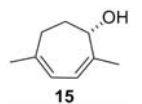

# Determination of optical purity

C:\Documents and Settings\PC-USER\My Documents\Data\TTTTTTTTTTTTTTTTTabuchi toshiki\TT1-110304-6-33-crude-1.jdf

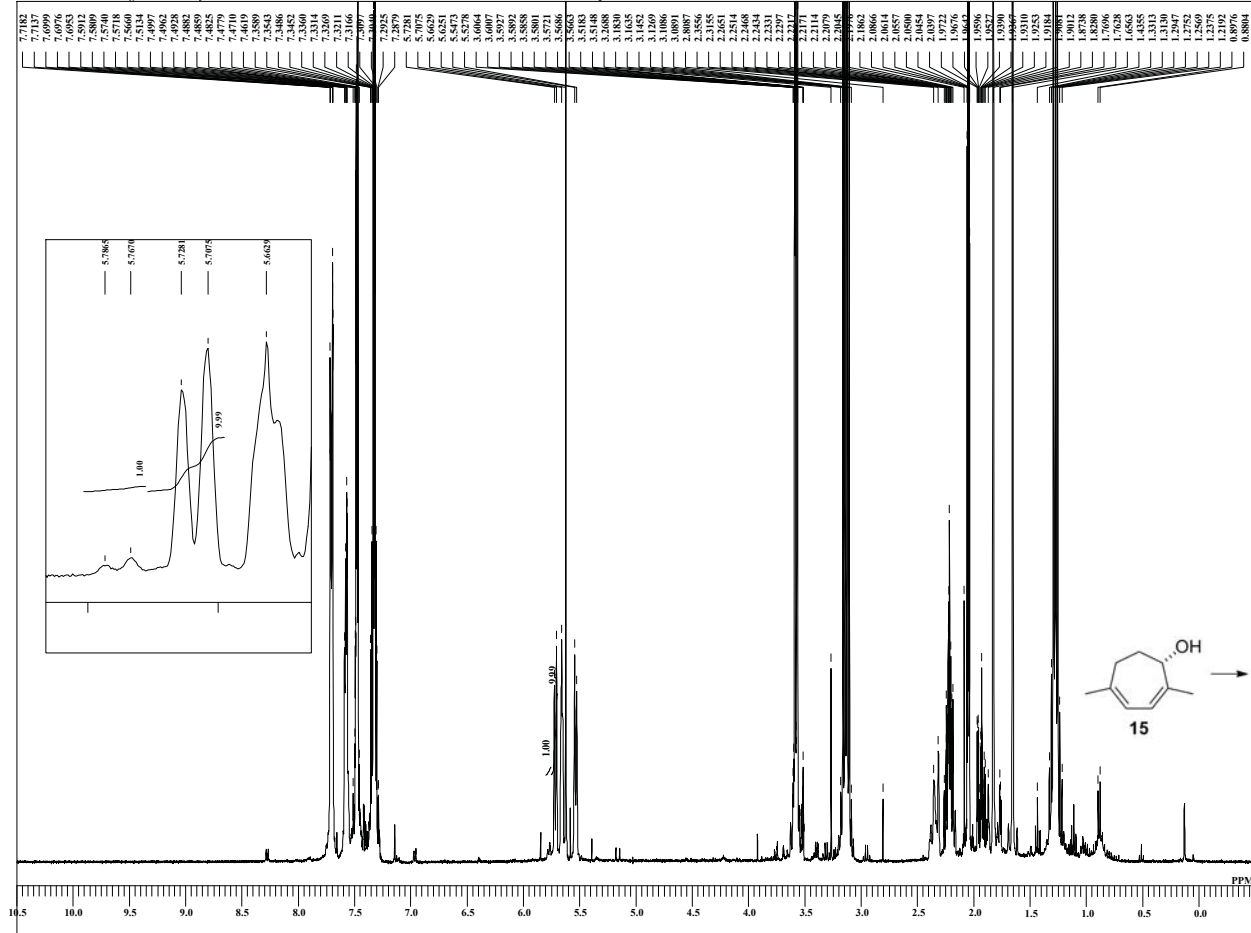

DFILE TT1-110304-6-33-crude-1.jdf  
 COMNT TT1-110304-6-33-crude  
 DATIM 04-03-2011 10:54:35  
 =====  
 1H  
 OBNUC 395.88 MHz  
 OFR 395.88 MHz  
 OFRQ 6.28 KHz  
 ORSET 0.87 Hz  
 OFIN 6.50 usec  
 DEADT 0.80 usec  
 PREDL 0.00000 msec  
 IWT 1.0000 sec  
 POINT 16384  
 SPO 16384  
 TIMES 8  
 DUMMV 1  
 FREQU 7422.80 Hz  
 FLT 30000 Hz  
 DELAY 16.68 usec  
 ACQTM 2.2073 sec  
 PD 10.0000 sec  
 SCANS 8  
 ADBT 16  
 RGAIN 34  
 BF 0.01 Hz  
 T1 0.00  
 T2 0.00  
 T3 90.00  
 T4 100.00  
 EXMOD single\_pulse.exe2  
 EXPCM 1H  
 IRNUC 395.88 MHz  
 IFR 395.88 MHz  
 IRSET 6.28 KHz  
 IRFIN 0.87 Hz  
 IRPW 115 usec  
 IRATN 79  
 DFILE TT1-110304-6-33-crude-1.jdf  
 SF 12.90 KHz  
 LKSET 59.1 Hz  
 LKLEV 0  
 LGAIN 0  
 LKPHS 0  
 LKSG 0 Hz  
 CSPED 0  
 FILDC  
 FILDF  
 CTEMP 21.0 c  
 SOLVT ACETN  
 EXREF 2.05 ppm

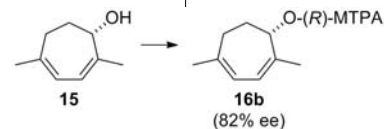

# Diene 7

G:\Phannou inoue\Tabuchi Toshiki\ryanodine\DATA\chiral-intermediate\diene-OTBS\diene-OTBS(4-45).als

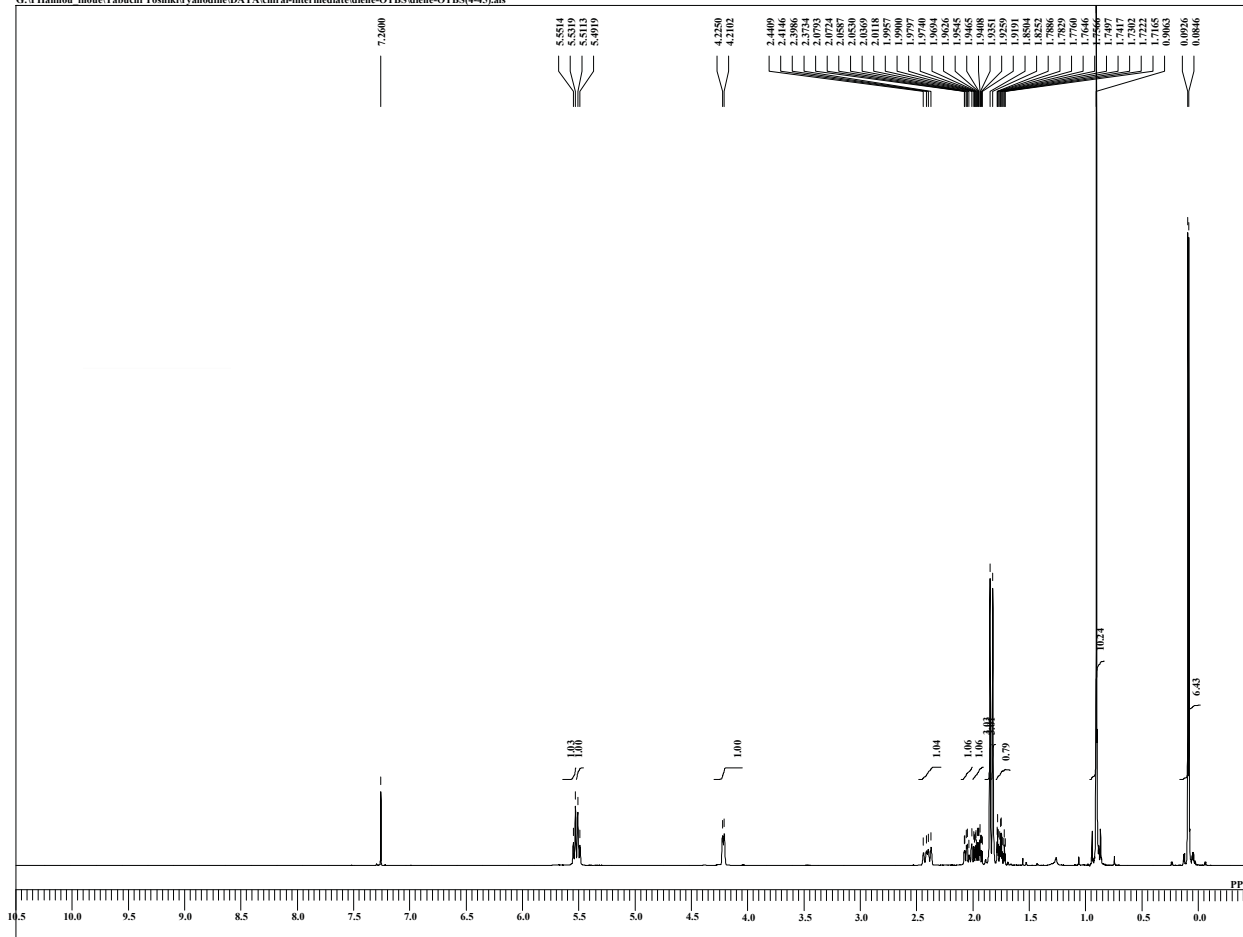

```

D1FILE diene-OTBS(4-45).als
COMNT 2-21b
DATIM 22-03-2010 14:13:48
MENUF
OBNUC 1H
OFR 395.88 MHz
OBFRO 395.88 MHz
OBSET 6.28 KHz
OBFIN 0.87 Hz
PW1 6.50 usec
DEADT 0.00 usec
PREDL 0.00000 msec
IWT 1.0000 sec
POINT 13107
SPO 13107
TIMES 8
DUMMY 1
FREQU 5938.15 Hz
FLT 30000 Hz
DELAY 16.68 usec
ACQTM 2.2073 sec
PD 2.0000 sec
SCANS 8
ADBIT 16
RGAIN 32
BF 0.12 Hz
T1 0.00
T2 0.00
T3 90.00
T4 100.00
EXMOD single_pulse.exe2
EXPCM
IRNUC 1H
IFR 395.88 MHz
IRSET 6.28 KHz
IRFIN 0.87 Hz
IRPW 115 usec
IRATN 79
D1FILE diene-OTBS(4-45).als
SF 4
LKSET 13.20 KHz
LKFIN 75.7 Hz
LKLEV 0
LGAIN 0
LKPHS 0
LKSG 0
CSPED 0 Hz
FILDC
FILDF
CTEMP 18.2 c
SLVNT CDCL3
EXREF 7.26 ppm
  
```

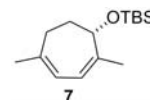

# Diene 7

G:\Phannou inoue\Tabuchi Toshiki\ryanodine\DATA\chiral-intermediate\diene-OTBS\diene-OTBS-C(4-45).als

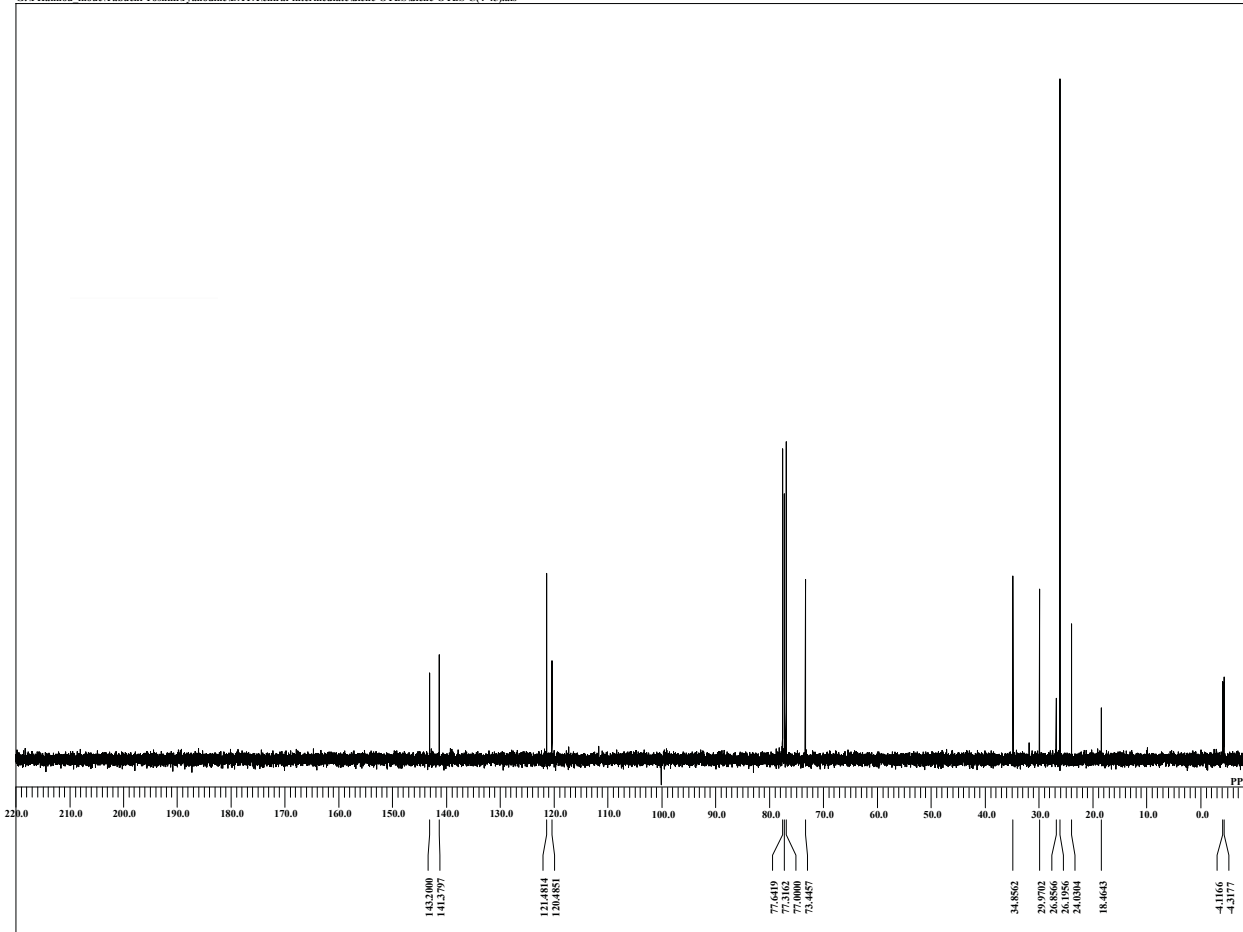

```

D1FILE diene-OTBS-C(4-45).als
COMNT 2-21b
DATIM 22-03-2010 14:19:38
MENUF
OBNUC 13C
OFR 99.55 MHz
OBFRO 99.55 MHz
OBSET 5.13 KHz
OBFIN 0.98 Hz
PW1 3.25 usec
DEADT 0.00 usec
PREDL 0.00000 msec
IWT 1.0000 sec
POINT 26214
SPO 26214
TIMES 81
DUMMY 4
FREQU 24999.62 Hz
FLT 125000 Hz
DELAY 20.50 usec
ACQTM 1.0486 sec
PD 2.0000 sec
SCANS 81
ADBIT 16
RGAIN 60
BF 0.12 Hz
T1 0.00
T2 0.00
T3 90.00
T4 100.00
EXMOD single_pulse_dec
EXPCM
IRNUC 1H
IFR 395.88 MHz
IRSET 6.28 KHz
IRFIN 0.87 Hz
IRPW 115 usec
IRATN 79
D1FILE diene-OTBS-C(4-45).als
SF 4
LKSET 13.20 KHz
LKFIN 75.7 Hz
LKLEV 0
LGAIN 0
LKPHS 0
LKSG 0
CSPED 0 Hz
FILDC
FILDF
CTEMP 18.5 c
SLVNT CDCL3
EXREF 77.00 ppm
  
```

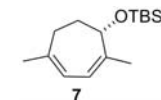

# Cyclopropane 17a

C:\Documents and Settings\PC-USER\My Documents\Data\TTTTTTTTTTTTTTTTTabuchi toshiki\Master thesis\letter\3-ring\TT1-120515-6-67-3-ring-1.lals

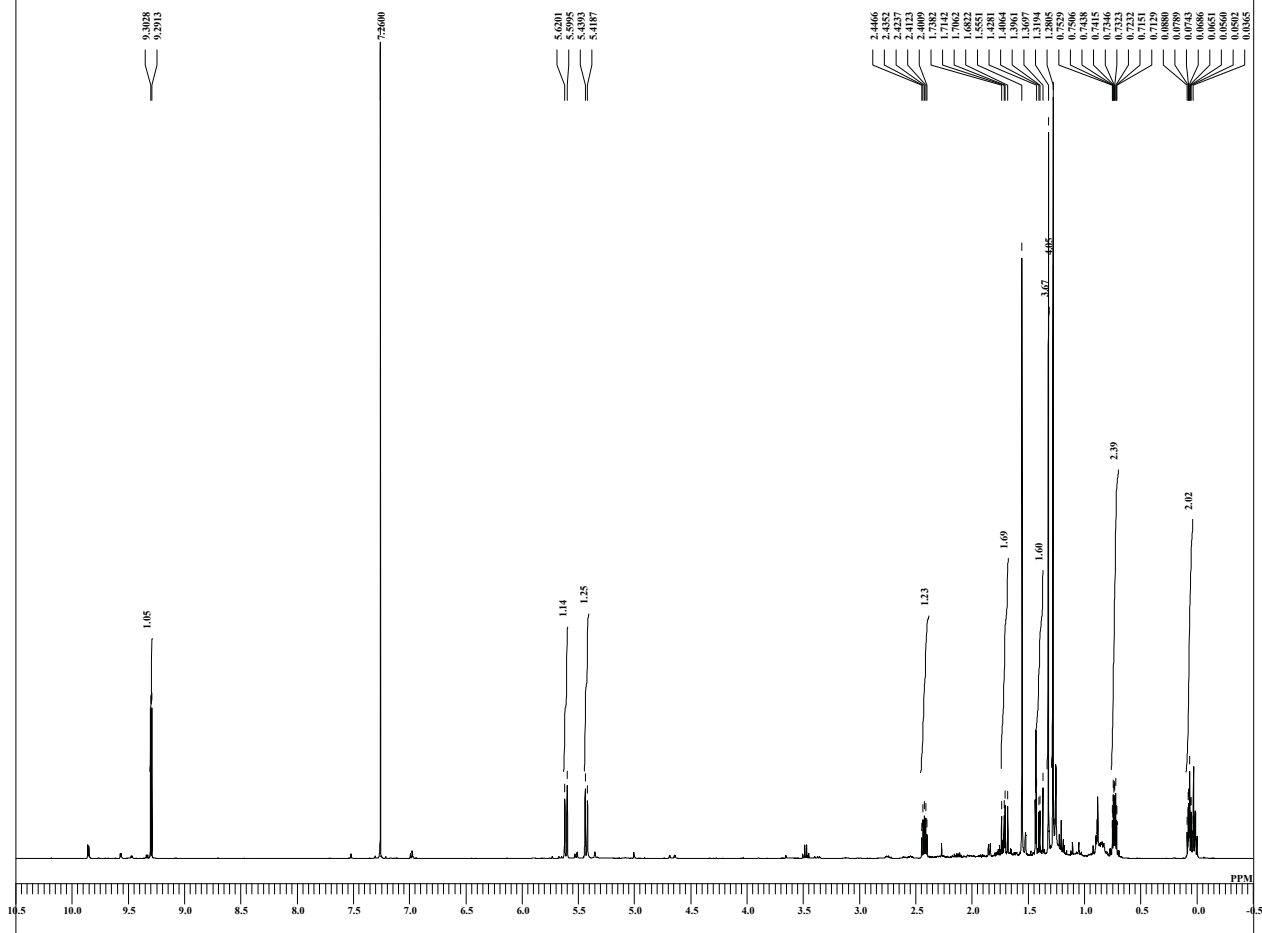

DFILE TT1-120515-6-67-3-ring-1.lals  
 COMNT TT1-120515-6-67-3-ring-1  
 DATIM 15-05-2012 23:06:48  
 MENUF  
 OBNUC 1H  
 OFR 395.88 MHz  
 OFRQ 395.88 MHz  
 OBSET 6.28 KHz  
 OFIN 0.87 Hz  
 PW1 6.55 usec  
 DEADT 0.00 usec  
 PREDL 0.00000 msec  
 IWT 1.0000 sec  
 POINT 13107  
 SPO 13107  
 TIMES 32  
 DUMMY 1  
 FREQU 5938.15 Hz  
 FLT 30000 Hz  
 DELAY 16.68 usec  
 ACQTM 2.2073 sec  
 PD 5.0000 sec  
 SCANS 32  
 ADBIT 16  
 RGAIN 38  
 BF 0.01 Hz  
 T1 0.00  
 T2 0.00  
 T3 90.00  
 T4 100.00  
 EXMOD single\_pulse.ex2  
 EXPCM  
 IRNUC 1H  
 IFR 395.88 MHz  
 IRSET 6.28 KHz  
 IRFIN 0.87 Hz  
 IRRPW 115 usec  
 IRATN 79  
 DFILE TT1-120515-6-67-3-ring-1.lals  
 SF  
 LKSET 13.20 KHz  
 LKFIN 75.7 Hz  
 LKLEV 0  
 LGAIN 0  
 LKPHS 0  
 LKSG 0  
 CSPED 0 Hz  
 FILDC  
 FILDF  
 CTMP 24.3 c  
 SLVNT CDCl3  
 EXREF 7.26 ppm

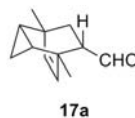

# Cyclopropane 17a

C:\Documents and Settings\PC-USER\My Documents\Data\TTTTTTTTTTTTTTTTTabuchi toshiki\Master thesis\letter\3-ring\TT1-120515-6-67-3-ring-C-1.lals

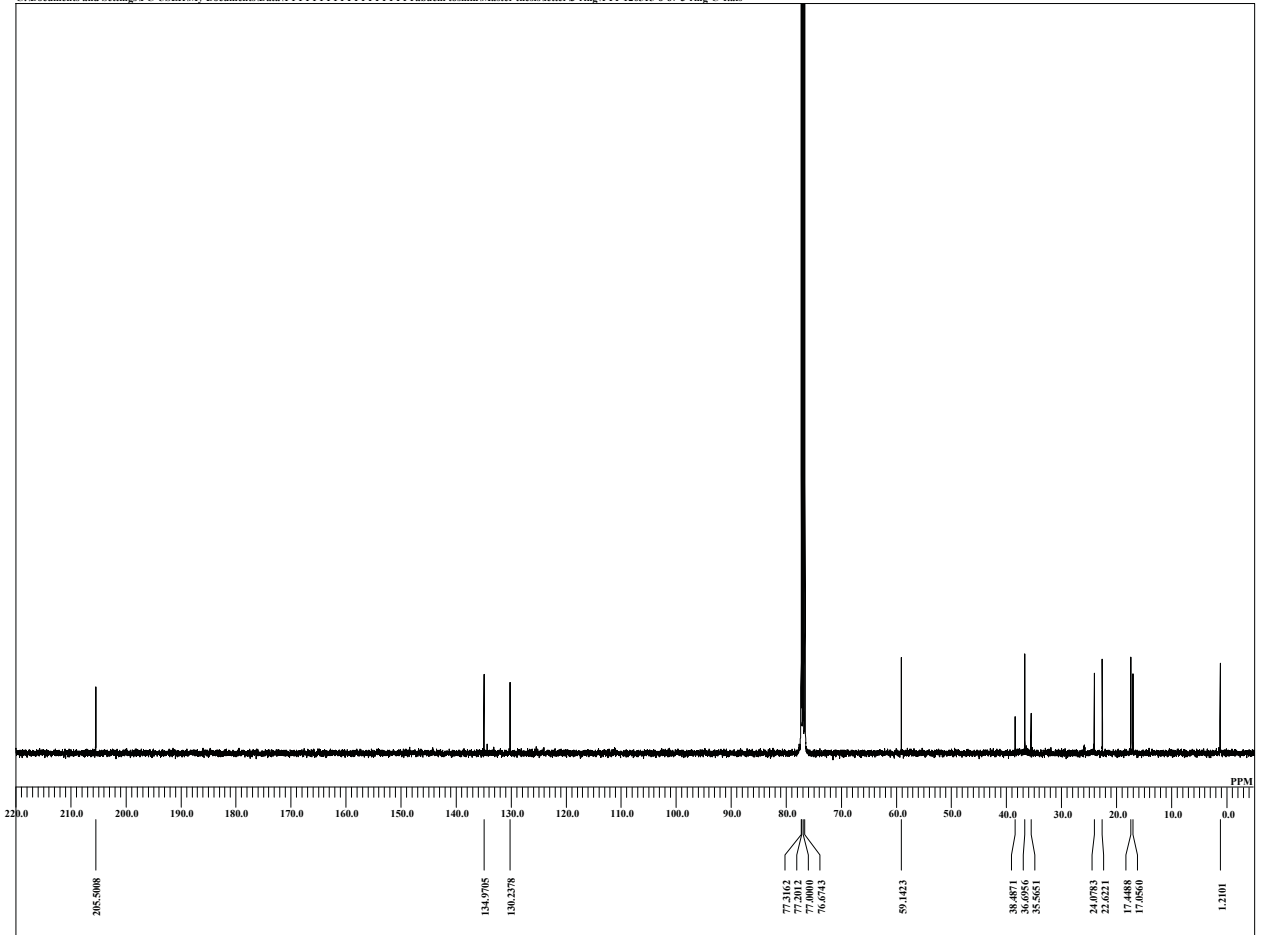

DFILE TT1-120515-6-67-3-ring-C-1.lals  
 COMNT TT1-120515-6-67-3-ring-C-1  
 DATIM 16-05-2012 08:26:15  
 MENUF  
 OBNUC 13C  
 OFR 99.55 MHz  
 OFRQ 99.55 MHz  
 OBSET 5.13 KHz  
 OFIN 0.98 Hz  
 PW1 3.67 usec  
 DEADT 0.00 usec  
 PREDL 0.00000 msec  
 IWT 1.0000 sec  
 POINT 26214  
 SPO 26214  
 TIMES 11000  
 DUMMY 4  
 FREQU 24999.62 Hz  
 FLT 125000 Hz  
 DELAY 20.50 usec  
 ACQTM 1.0486 sec  
 PD 2.0000 sec  
 SCANS 11000  
 ADBIT 16  
 RGAIN 60  
 BF 1.00 Hz  
 T1 0.00  
 T2 0.00  
 T3 90.00  
 T4 100.00  
 EXMOD single\_pulse\_dec  
 EXPCM  
 IRNUC 1H  
 IFR 395.88 MHz  
 IRSET 6.28 KHz  
 IRFIN 0.87 Hz  
 IRRPW 115 usec  
 IRATN 79  
 DFILE TT1-120515-6-67-3-ring-C-1.lals  
 SF  
 LKSET 13.20 KHz  
 LKFIN 75.7 Hz  
 LKLEV 0  
 LGAIN 0  
 LKPHS 0  
 LKSG 0  
 CSPED 0 Hz  
 FILDC  
 FILDF  
 CTMP 23.8 c  
 SLVNT CDCl3  
 EXREF 77.00 ppm

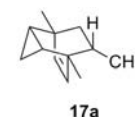

Cycloadduct 8

G:\Phannou inoue\Tabuchi Toshiki\ryanodine\DATA\chiral-intermediate\OTBS-DA-acrolein\TT1-100331-4-59-2nd44-1.als

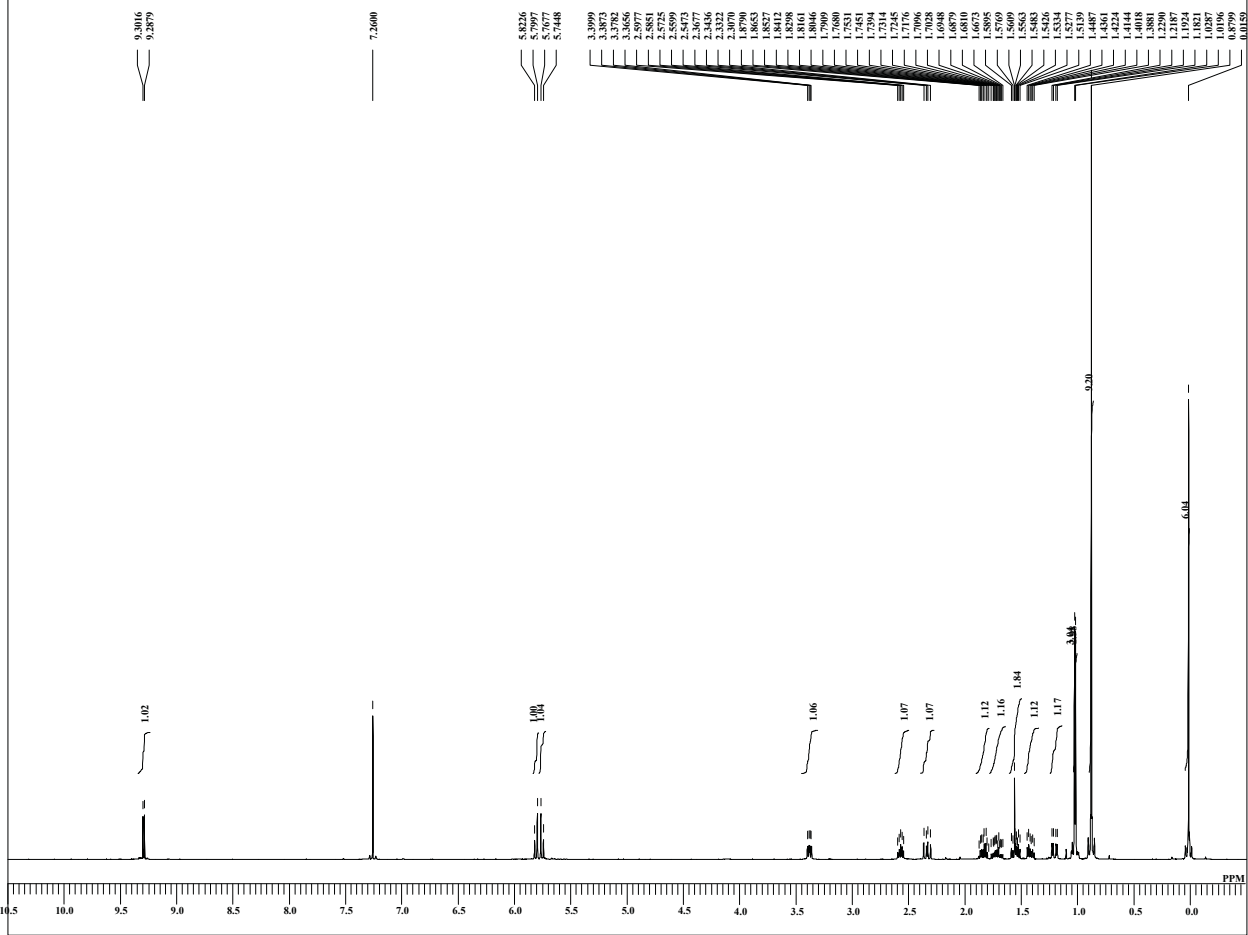

DFILE TT1-100331-4-59-2nd44-1.als  
COMNT 2-28b  
DATIM 31-03-2010 02:32:20  
MENUF  
OBNUC 1H  
OFR 395.88 MHz  
OFRFQ 395.88 MHz  
OBSET 6.28 KHz  
OBFIN 0.87 Hz  
PW1 6.50 usec  
DEADT 0.00 usec  
PREDL 0.00000 msec  
IWT 1.0000 sec  
POINT 16384  
SPO 16384  
TIMES 16  
DUMMY 1  
FREQU 7422.80 Hz  
FLT 30000 Hz  
DELAY 16.68 usec  
ACQTM 2.2073 sec  
PD 2.0000 sec  
SCANS 16  
ADBIT 16  
RGAIN 44  
BF 0.01 Hz  
T1 0.00  
T2 0.00  
T3 90.00  
T4 100.00  
EXMOD single\_pulse.ex2  
EXPCM  
IRNUC 1H  
IFR 395.88 MHz  
IRSET 6.28 KHz  
IRFIN 0.87 Hz  
IRRPW 115 usec  
IRATN 79  
DFILE TT1-100331-4-59-2nd44-1.als  
SF  
LKSET 13.20 KHz  
LKFIN 75.7 Hz  
LKLEV 0  
LGAIN 0  
LKPHS 0  
LKSG 0  
CSPED 0 Hz  
FILDC  
FILDF  
CTEMP 18.5 c  
SLVNT CDCL3  
XREF 7.26 ppm

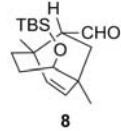

Cycloadduct 8

G:\Phannou inoue\Tabuchi Toshiki\ryanodine\DATA\chiral-intermediate\OTBS-DA-acrolein\DA-OTBS-acrolein-C(4-59).als

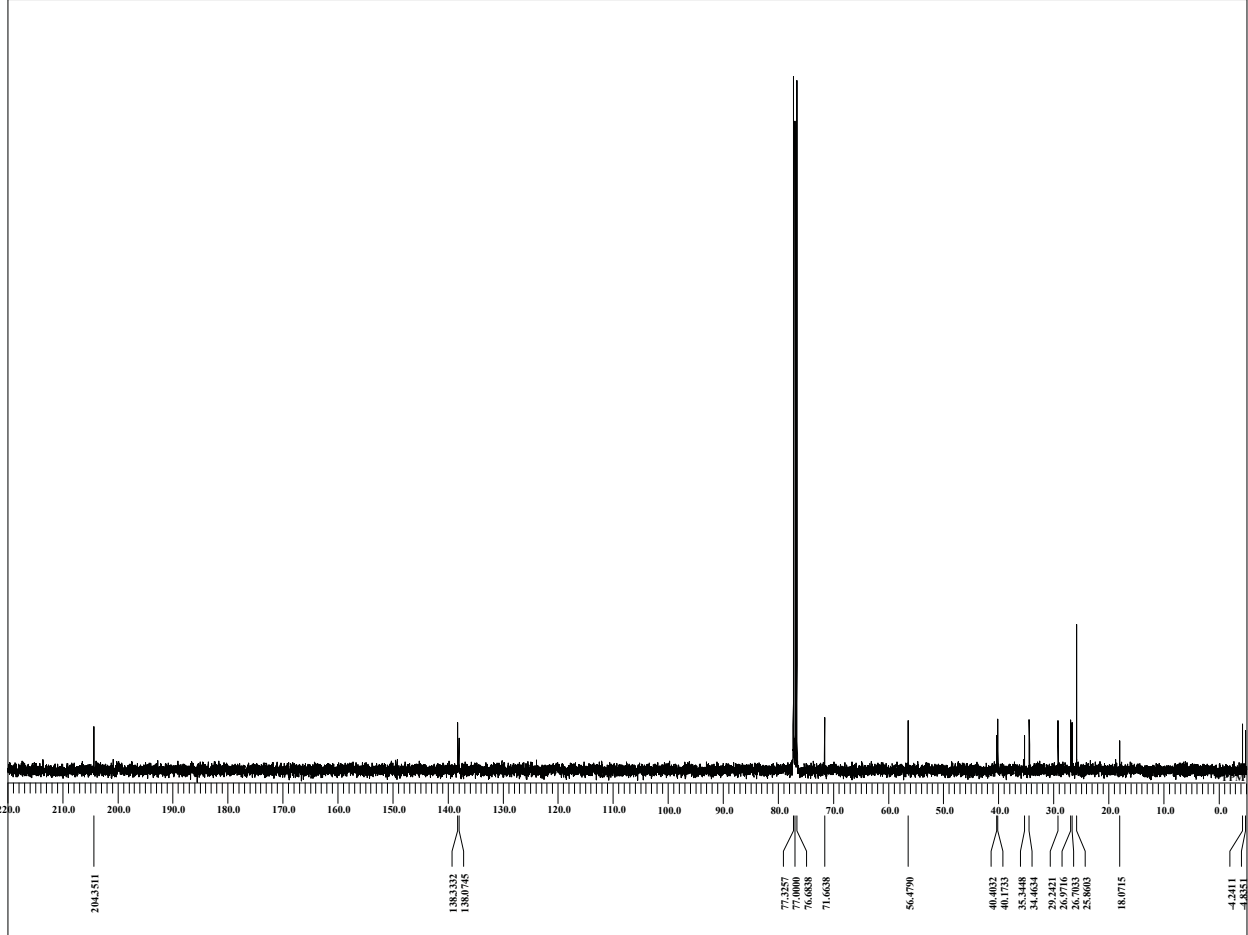

DFILE DA-OTBS-acrolein-C(4-59).als  
COMNT 2-28b  
DATIM 31-03-2010 02:44:52  
MENUF  
OBNUC 13C  
OFR 99.55 MHz  
OFRFQ 99.55 MHz  
OBSET 5.13 KHz  
OBFIN 0.98 Hz  
PW1 3.25 usec  
DEADT 0.00 usec  
PREDL 0.00000 msec  
IWT 1.0000 sec  
POINT 26214  
SPO 26214  
TIMES 184  
DUMMY 4  
FREQU 24999.62 Hz  
FLT 125000 Hz  
DELAY 20.50 usec  
ACQTM 1.0486 sec  
PD 2.0000 sec  
SCANS 184  
ADBIT 16  
RGAIN 60  
BF 1.00 Hz  
T1 0.00  
T2 0.00  
T3 90.00  
T4 100.00  
EXMOD single\_pulse\_dec  
EXPCM  
IRNUC 1H  
IFR 395.88 MHz  
IRSET 6.28 KHz  
IRFIN 0.87 Hz  
IRRPW 115 usec  
IRATN 79  
DFILE DA-OTBS-acrolein-C(4-59).als  
SF  
LKSET 13.20 KHz  
LKFIN 75.7 Hz  
LKLEV 0  
LGAIN 0  
LKPHS 0  
LKSG 0  
CSPED 0 Hz  
FILDC  
FILDF  
CTEMP 18.5 c  
SLVNT CDCL3  
XREF 77.00 ppm

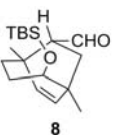

Cycloadduct 20

G:\Phannou inoue\Tabuchi Toshiki\ryanodine\DATA\chiral-intermediate-OTBS-DA-acrolein\DA-OTBS-acrolein-radio(4-59).als

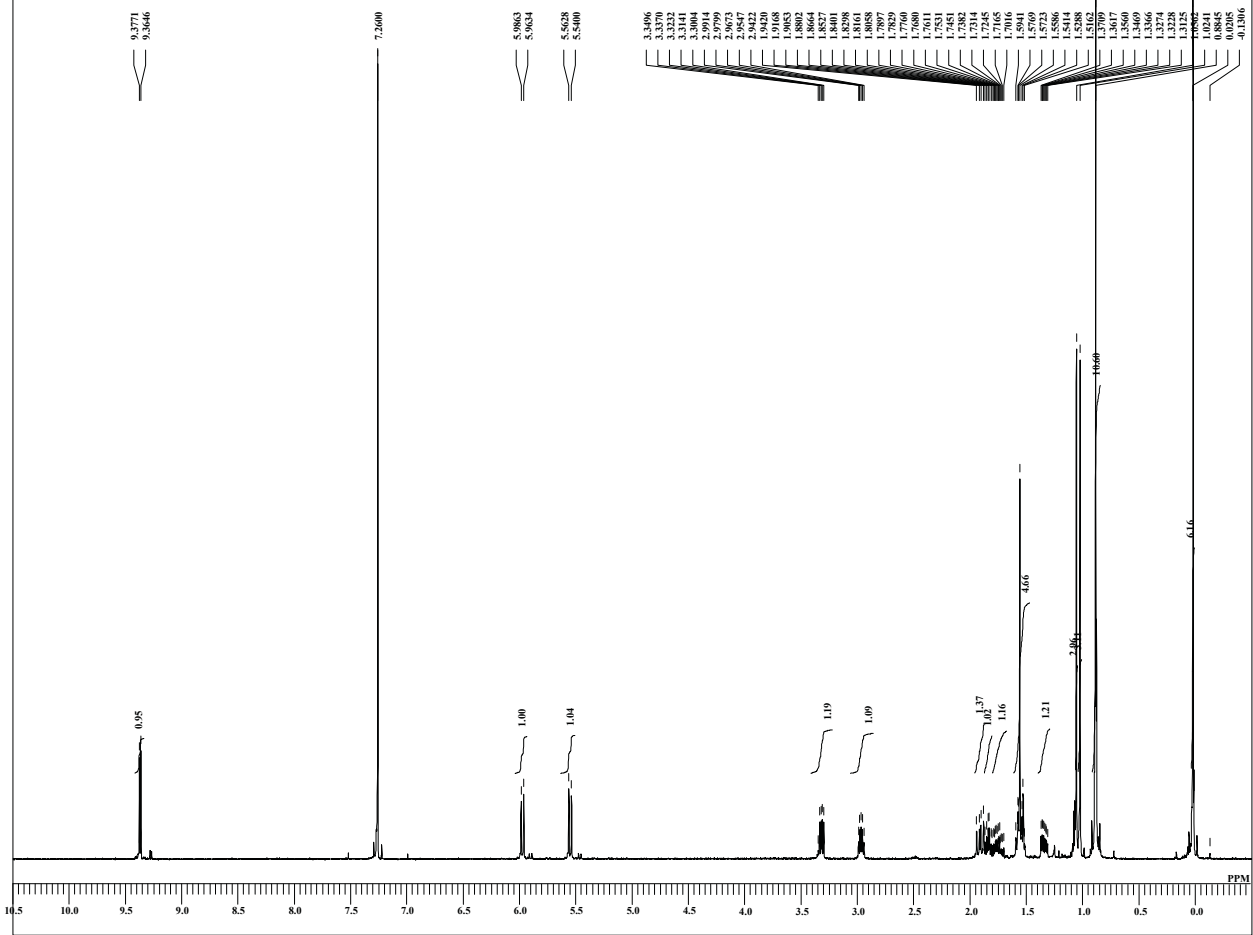

DFILE DA-OTBS-acrolein-radio(4-59).al  
COMNT 2-29b  
DATIM 31-03-2010 16:57:37  
MENUF  
OBNUC 1H  
OFR 395.88 MHz  
OFRFQ 395.88 MHz  
OBSET 6.28 KHz  
OBFIN 0.87 Hz  
PW1 6.50 usec  
DEADT 0.00 usec  
PREDL 0.000000 msec  
IWT 1.0000 sec  
POINT 13107  
SPO 13107  
TIMES 16  
DUMMY 1  
FREQU 5938.15 Hz  
FLT 30000 Hz  
DELAY 16.68 usec  
ACQTM 2.2073 sec  
PD 2.0000 sec  
SCANS 16  
ADBIT 16  
RGAIN 50  
BF 0.01 Hz  
T1 0.00  
T2 0.00  
T3 90.00  
T4 100.00  
EXMOD single\_pulse.ex2  
EXPCM  
IRNUC 1H  
IFR 395.88 MHz  
IRSET 6.28 KHz  
IRFIN 0.87 Hz  
IRRPW 115 usec  
IRATN 79  
DFILE DA-OTBS-acrolein-radio(4-59).al  
SF  
LKSET 13.20 KHz  
LKFIN 75.7 Hz  
LKLEV 0  
LGAIN 0  
LKPHS 0  
LKSG 0  
CSPED 0 Hz  
FILDLC  
FILDLC  
CTEMP 18.1 c  
SLVNT CDCL3  
EXREF 7.26 ppm

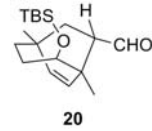

Cycloadduct 20

G:\Phannou inoue\Tabuchi Toshiki\ryanodine\DATA\chiral-intermediate-OTBS-DA-acrolein\TT1-100331-4-59-radio-C-1.als

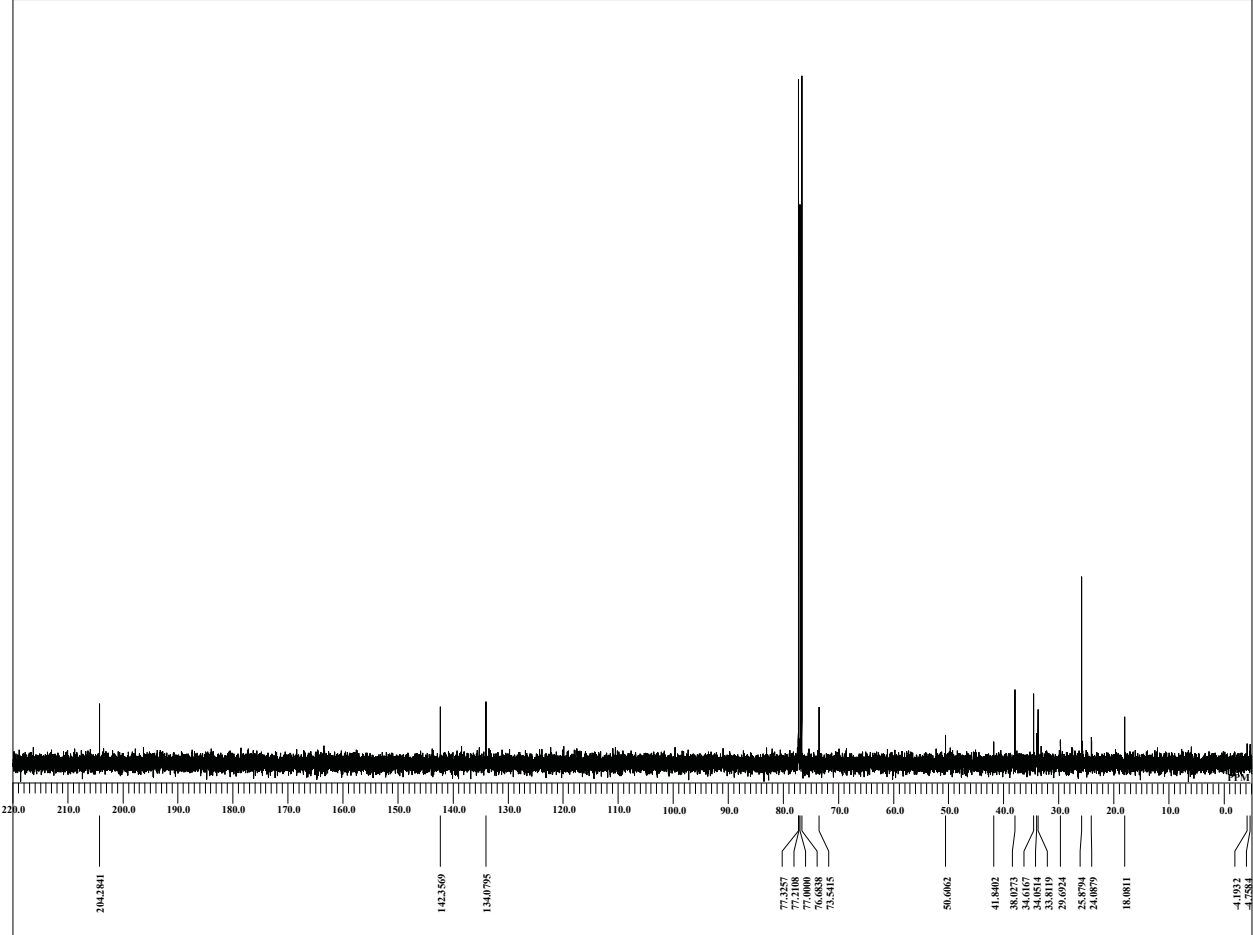

DFILE TT1-100331-4-59-radio-C-1.als  
COMNT 2-29  
DATIM 31-03-2010 19:26:06  
MENUF  
OBNUC 13C  
OFR 99.55 MHz  
OFRFQ 99.55 MHz  
OBSET 5.13 KHz  
OBFIN 0.98 Hz  
PW1 3.25 usec  
DEADT 0.00 usec  
PREDL 0.000000 msec  
IWT 1.0000 sec  
POINT 26214  
SPO 26214  
TIMES 188  
DUMMY 4  
FREQU 24999.62 Hz  
FLT 125000 Hz  
DELAY 20.50 usec  
ACQTM 1.0486 sec  
PD 2.0000 sec  
SCANS 188  
ADBIT 16  
RGAIN 60  
BF 0.01 Hz  
T1 0.00  
T2 0.00  
T3 90.00  
T4 100.00  
EXMOD single\_pulse\_dec  
EXPCM  
IRNUC 1H  
IFR 395.88 MHz  
IRSET 6.28 KHz  
IRFIN 0.87 Hz  
IRRPW 115 usec  
IRATN 79  
DFILE TT1-100331-4-59-radio-C-1.als  
SF  
LKSET 13.20 KHz  
LKFIN 75.7 Hz  
LKLEV 0  
LGAIN 0  
LKPHS 0  
LKSG 0  
CSPED 0 Hz  
FILDLC  
FILDLC  
CTEMP 18.4 c  
SLVNT CDCL3  
EXREF 77.00 ppm

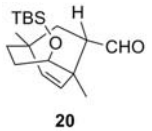

# Oxime 24a

G:\PHannou inoue\Tabuchi Toshik\ryanodine\DATA\chiral-intermediate\7-memb-DA-oxim\TT1-110317-6-45-f14-f12.als

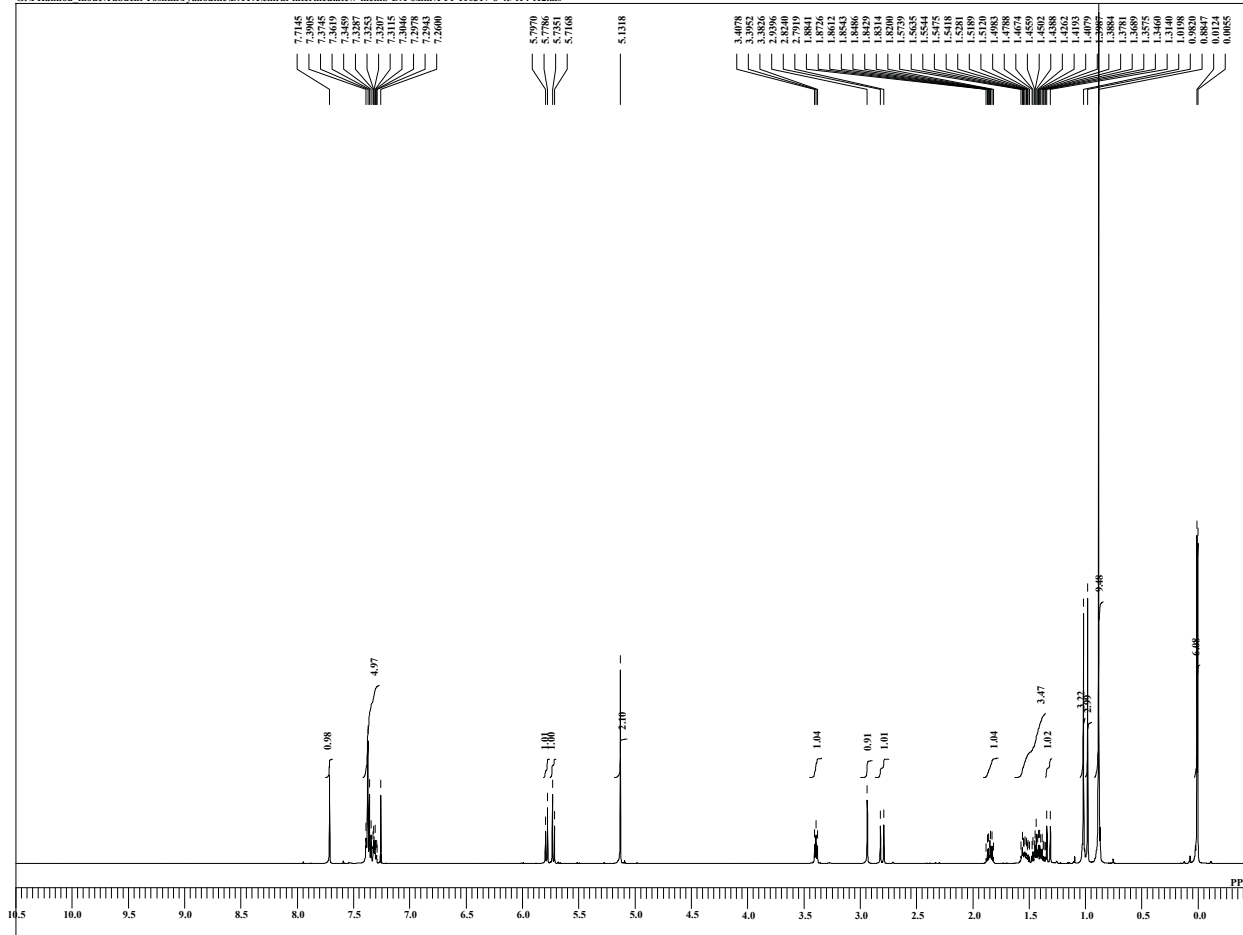

```

DFILE TT1-110317-6-45-f14-f12.als
COMNT 2-34
DATIM 17-03-2011 13:01:03
MENUF
OBNUC 1H
OFR 495.13 MHz
OBRFQ 495.13 MHz
OBSET 4.38 KHz
OBFIN 9.64 Hz
PW1 6.00 usec
DEADT 0.00 usec
PREDL 0.00000 msec
IWT 1.0000 sec
POINT 13107
SPO 13107
TIMES 8
DUMMY 1
FREQU 7429.51 Hz
FLT 38000 Hz
DELAY 13.16 usec
ACQTM 1.7642 sec
PD 3.0000 sec
SCANS 8
ADBIT 16
RGAIN 48
BF 0.01 Hz
T1 0.00
T2 0.00
T3 90.00
T4 100.00
EXMOD single_pulse.ex2
EXPCM
IRNUC 1H
IFR 495.13 MHz
IRSET 4.38 KHz
IRFIN 9.64 Hz
IRRPW 118 usec
IRATN 10
DFILE TT1-110317-6-45-f14-f12.als
SF -601.50 KHz
LKSET -1.8 Hz
LKFIN 0
LGAIN 0
LKPHS 0
LKSG 0
CSPED 0 Hz
FILDC
FILDF
CTEMP 21.7 c
SOLNT CDCl3
XREF 7.26 ppm
  
```

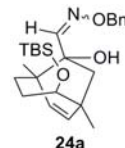

# Oxime 24a

G:\PHannou inoue\Tabuchi Toshik\ryanodine\DATA\chiral-intermediate\7-memb-DA-oxim\TT1-6-45-f14-f12-C.als

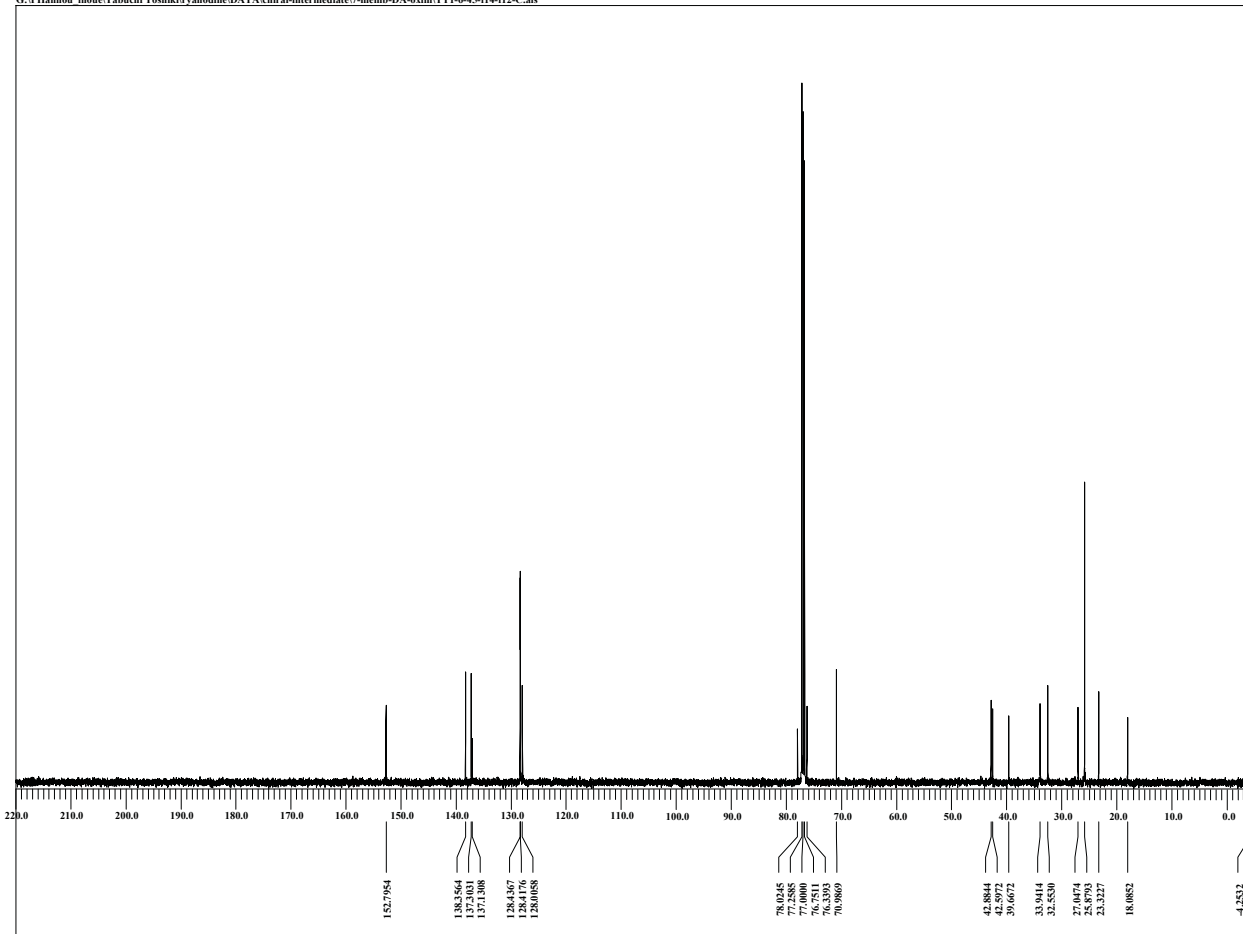

```

DFILE TT1-6-45-f14-f12-C.als
COMNT 2-34
DATIM 17-03-2011 13:58:08
MENUF
OBNUC 13C
OFR 124.51 MHz
OBRFQ 124.51 MHz
OBSET 3.45 KHz
OBFIN 6.00 Hz
PW1 3.25 usec
DEADT 0.00000 msec
PREDL 1.0000 sec
IWT 1.0000 sec
POINT 26214
SPO 26214
TIMES 1000
DUMMY 4
FREQU 31249.52 Hz
FLT 157000 Hz
DELAY 20.30 usec
ACQTM 0.63389 sec
PD 2.0000 sec
SCANS 1000
ADBIT 16
RGAIN 56
BF 1.00 Hz
T1 0.00
T2 0.00
T3 90.00
T4 100.00
EXMOD single_pulse_dec
EXPCM
IRNUC 1H
IFR 495.13 MHz
IRSET 4.38 KHz
IRFIN 9.64 Hz
IRRPW 92 usec
IRATN 79
DFILE TT1-6-45-f14-f12-C.als
SF -601.50 KHz
LKSET -1.8 Hz
LKFIN 0
LGAIN 0
LKPHS 0
LKSG 0
CSPED 0 Hz
FILDC
FILDF
CTEMP 22.3 c
SOLNT CDCl3
XREF 77.00 ppm
  
```

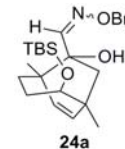

C:\Documents and Settings\PC-I\USER\My Documents\Data\TTTTTTTTTTTTTTTTTabuchi toshiki\Master thesis\letter\oxim-dia\24b.als

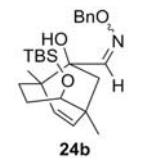

C:\Documents and Settings\PC-USER\My Documents\Data\TTTTTTTTTTTTTTTTTabuchi toshiki\Master thesis\letter\oxim-dia\TT1-121009-6-93-tmb-C-1.als

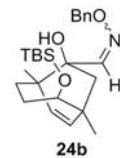



## Ketone 27

G:\Phannou inoue\Tabuchi Toshiki\ryanodine\DATA\chiral-intermediate\ring-expansion\TT1-110323-6-49-TM.lals

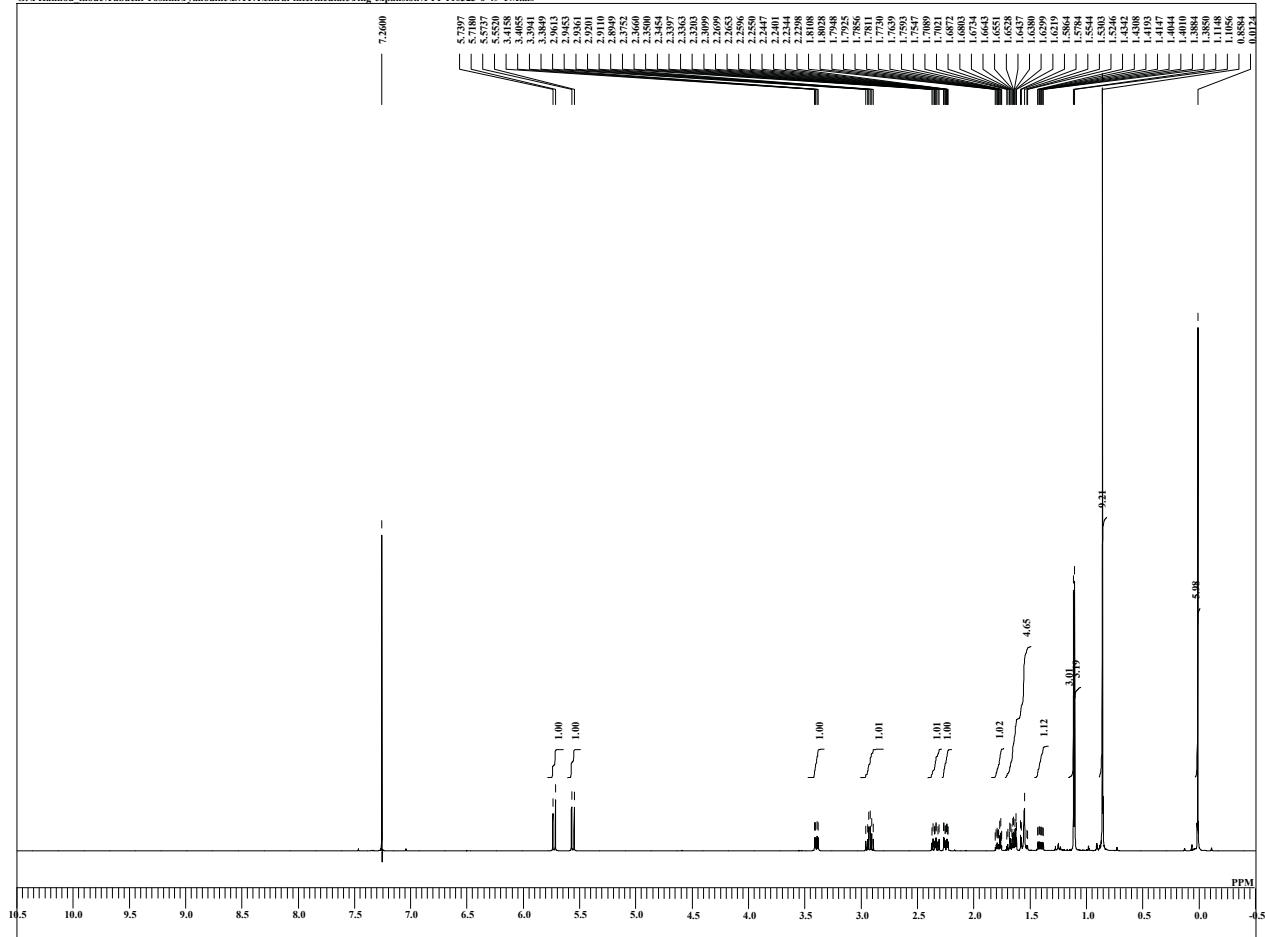

DFILE TTI-110323-6-49-TM.lals  
COMNT 2-38  
DATIM 23-03-2011 21:51:25  
MENUE  
OBNUC 1H  
OFR 495.13 MHz  
OFRQ 495.13 MHz  
OBSET 4.38 kHz  
OBFIN 9.64 Hz  
PW1 6.00 usec  
DEADT 0.00 usec  
PREDL 0.00000 msec  
IWT 1.0000 sec  
POINT 13107  
SPO 13107  
TIMES 16  
DUMMY 1  
FREQU 7429.31 Hz  
FLT 38000 Hz  
DELAY 13.16 usec  
ACQTM 1.7642 sec  
PD 5.00000 sec  
SCANS 16  
ADBIT 16  
RGAIN 56  
BF 0.01 Hz  
T1 0.00  
T2 0.00  
T3 90.00  
T4 100.00  
EXMOD single\_pulse.ex2  
EXPCM  
IRNUC 1H  
IFR 495.13 MHz  
IRSET 4.38 kHz  
IRFIN 9.64 Hz  
IRRPW 75 usec  
IRATN 79  
DFILE TTI-110323-6-49-TM.lals  
SF -601.50 kHz  
LKSET -1.8 Hz  
LKLEV 0  
LGAIN 0  
LKPHS 0  
LKSG 0 Hz  
CSPED  
FILDC  
FILDF  
CTEMP 21.1 c  
SYNT CDCL3  
XREF 7.26 ppm

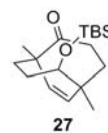

## Ketone 27

G:\Phannou inoue\Tabuchi Toshiki\ryanodine\DATA\chiral-intermediate\ring-expansion\TT1-110323-6-49-TM-Cals

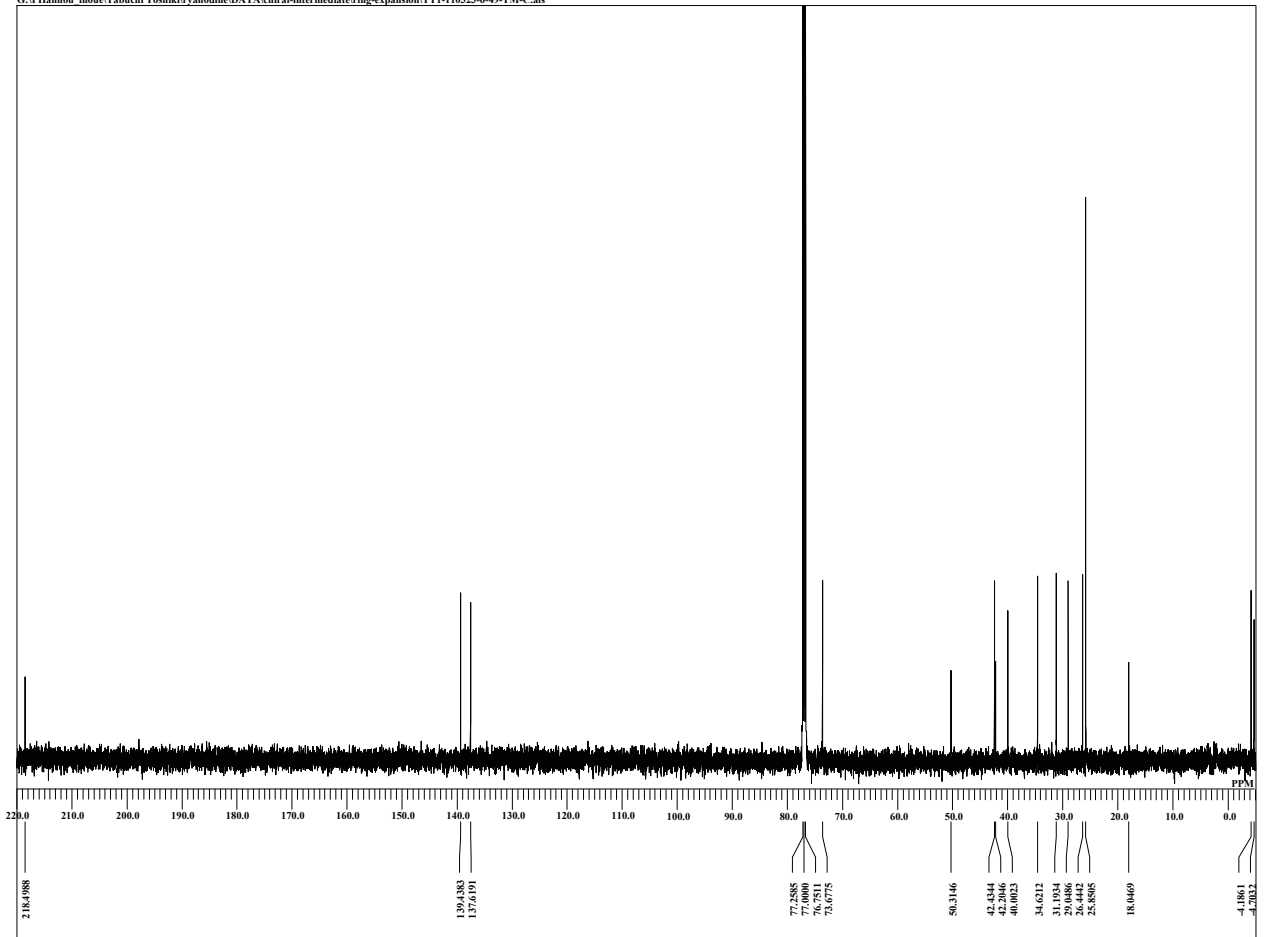

DFILE TTI-110323-6-49-TM-Cals  
COMNT 2-38  
DATIM 24-03-2011 04:59:02  
MENUE  
OBNUC 13C  
OFR 124.51 MHz  
OFRQ 124.51 MHz  
OBSET 3.45 kHz  
OBFIN 6.00 Hz  
PW1 3.25 usec  
DEADT 0.00 usec  
PREDL 0.00000 msec  
IWT 1.0000 sec  
POINT 26214  
SPO 26214  
TIMES 9000  
DUMMY 4  
FREQU 31249.52 Hz  
FLT 157000 Hz  
DELAY 20.80 usec  
ACQTM 0.8389 sec  
PD 2.0000 sec  
SCANS 9000  
ADBIT 16  
RGAIN 54  
BF 1.00 Hz  
T1 0.00  
T2 0.00  
T3 90.00  
T4 100.00  
EXMOD single\_pulse\_dec  
EXPCM  
IRNUC 1H  
IFR 495.13 MHz  
IRSET 4.38 kHz  
IRFIN 9.64 Hz  
IRRPW 92 usec  
IRATN 79  
DFILE TTI-110323-6-49-TM-Cals  
SF -601.50 kHz  
LKSET -1.8 Hz  
LKLEV 0  
LGAIN 0  
LKPHS 0  
LKSG 0 Hz  
CSPED  
FILDC  
FILDF  
CTEMP 21.6 c  
SYNT CDCL3  
XREF 77.00 ppm

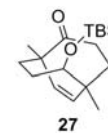

Supplement: Additional file 1 [file 1860-5397-9-74-S1.pdf]
